# Supplementary material for: Mechanochemical preparation of strongly emissive monosubstituted triarylphosphane gold(i) compounds activated by hydrogen bonding driven aggregations
Source: Royal Society of Chemistry journal article supplement (doi:10.1039/d3ra03681b), 2023-01-01
Supplement: d3ra03681b1.pdf [file d3ra03681b1.pdf]

**Mechanochemical preparation of strongly emissive monosubstituted triarylphosphane gold(I) compounds activated by hydrogen bonding driven aggregations**

*Lorenzo Luciani,<sup>a</sup> Nicola Sargentoni,<sup>a</sup> Claudia Graiff,<sup>b</sup> Miguel Monge,<sup>c</sup> María Rodríguez-Castillo,<sup>c</sup> José Lopez de Luzuriaga,<sup>c</sup> Rossana Galassi,<sup>a\*</sup>*

---

*University of Camerino, School of Science and Technology, Chemistry Division, c/o ChIP, Via Madonna delle Carceri, 10, Camerino, I-62032, Italy*

*<sup>b</sup> Department of Chemistry, Life Sciences and Environmental Sustainability, Product Development, Università degli Studi di Parma, Parco Area delle Scienze 17/A, Parma, I-43124, Italy*

*<sup>c</sup> Universidad de La Rioja, Departamento de Química, Área de Química Inorgánica, Centro de Investigación en Síntesis Química Complejo Científico-Tecnológico Madre de Dios, 51, 26004 Logroño (La Rioja), España-Spain.*

**Supporting Information**

**Table 1S.** The table reports the list of a) the C=O stretching mode wavenumbers recorded for the mono- and bis-phosphane complexes, b)  $\Delta_{\text{C=O}}$  values ( $\Delta_{\text{C=O}}$  = difference of wavenumbers between the complex and the starting ligands), c)  $^{31}\text{P}$  NMR resonances of the mono- and bis-phosphane complexes in  $\text{CDCl}_3$ , and d)  $\Delta_{\text{ppm}}$  values ( $\Delta_{\text{ppm}}$  = chemical shifts' change upon coordination of the ligand to the metal).

| Compounds                                                   | C=O stretching mode, $\text{cm}^{-1}$ | $\Delta_{\text{C=O}}$ $\text{cm}^{-1}$ | $^{31}\text{P}$ NMR <sup>a</sup> (Full Width at Half Maximum) | $\Delta_{\text{ppm}}$ $^{31}\text{P}$ NMR |
|-------------------------------------------------------------|---------------------------------------|----------------------------------------|---------------------------------------------------------------|-------------------------------------------|
| <b>L</b>                                                    |                                       |                                        | 4.70 <sup>a</sup>                                             |                                           |
| <b>L<sup>COOH</sup></b>                                     | 1680                                  | -                                      | -4.68, -5.33 <sup>b</sup>                                     | -                                         |
| <b>L<sup>COOMe</sup></b>                                    | 1719                                  | -                                      | -5.01                                                         | -                                         |
| <b>L<sup>COOEt</sup></b>                                    | 1714                                  | -                                      | -5.16                                                         | -                                         |
| <b>L<sup>COOH</sup>AuCl (1)</b>                             | 1682                                  | +2                                     | 33.22                                                         | +37.90                                    |
| <b>L<sup>COOMe</sup>AuCl (2)</b>                            | 1719                                  | 0                                      | 33.08                                                         | +39.14                                    |
| <b>L<sup>COOEt</sup>AuCl (3)</b>                            | 1719                                  | 0                                      | 33.02                                                         | +39.14                                    |
| <b>(L<sup>COOH</sup>)<sub>2</sub>AuCl (4)*</b>              | 1717                                  | +37                                    | 43.57 <sup>a</sup> (109 Hz)                                   | +38.34 <sup>c</sup>                       |
| <b>(L<sup>COOMe</sup>)<sub>2</sub>AuOTf (5)</b>             | 1718                                  | -1                                     | 44.16 (125 Hz)                                                | +49.18                                    |
| <b>(L<sup>COOMe</sup>)<sub>2</sub>AuPF<sub>6</sub> (6)</b>  | 1719                                  | 0                                      | 36.65 (160 Hz)                                                | +41.66 <sup>d</sup>                       |
| <b>(L<sup>COOMe</sup>)<sub>2</sub>AuBAr<sub>4</sub> (7)</b> | 1733                                  | +14                                    | 46.10 (9 Hz)                                                  | +51.11                                    |
| <b>(L<sup>COOEt</sup>)<sub>2</sub>AuPF<sub>6</sub> (8)</b>  | 1719                                  | +5                                     | 44.82 (10 Hz)                                                 | +50.31                                    |
| <b>(L<sup>COOEt</sup>)<sub>2</sub>AuBAr<sub>4</sub> (9)</b> | 1722                                  | +8                                     | 44.95 (2 Hz)                                                  | +50.44                                    |

<sup>a</sup> taken from Boris Maryasina and Hendrik Zipse, *Phys. Chem. Chem. Phys.*, 2011, **13**, 5150-5158.

<sup>b</sup> The  $(\text{L}^{\text{COOH}})_2\text{AuCl}$  (**4**)  $^{31}\text{P}$  NMR resonance is reported in  $\text{CD}_3\text{OD}$  at 293 K, due to the low solubility of the complex in  $\text{CDCl}_3$ .

<sup>c</sup> the difference is between the  $^{31}\text{P}$  NMR signals in  $\text{CD}_3\text{OD}$ .

<sup>d</sup> The  $\text{PF}_6$  ion resulted to be completely hydrolysed in the deuterated solvent to afford the  $\text{PO}_2\text{F}_2$  anion during the  $^{31}\text{P}$  NMR recording.

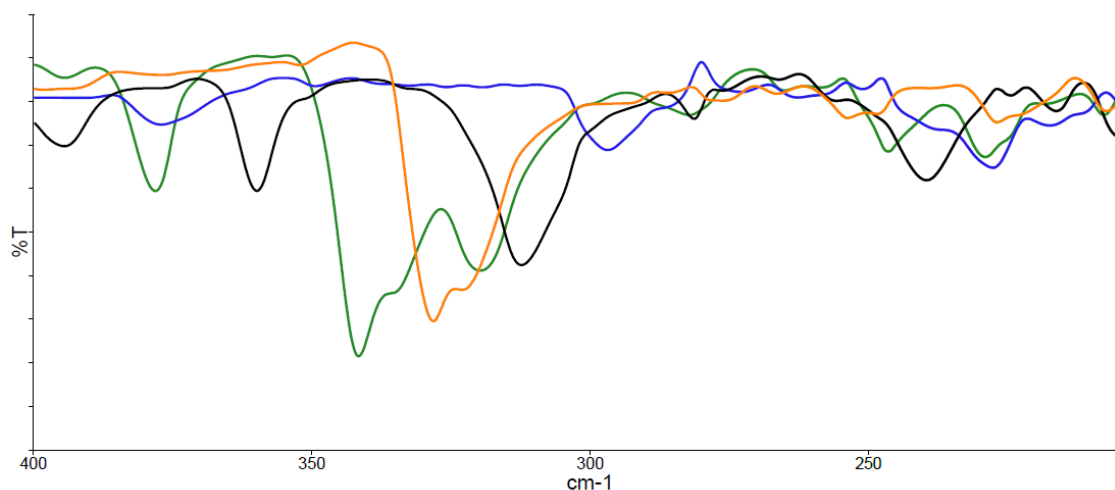

**Figure 1S.** Overlapped Far-IR spectra in the range 400-200  $\text{cm}^{-1}$  for  $\text{L}^{\text{COOH}}$  (black line),  $\text{L}^{\text{COOH}}\text{AuCl}$  (1) (green line),  $(\text{L}^{\text{COOH}})_2\text{AuCl}$  (4) (blue line),  $\text{PPh}_3\text{AuCl}$  (orange line). The  $\text{PPh}_3\text{PAuCl}$  was added as a reference for the stretching modes of the linear P-Au-Cl bonds.

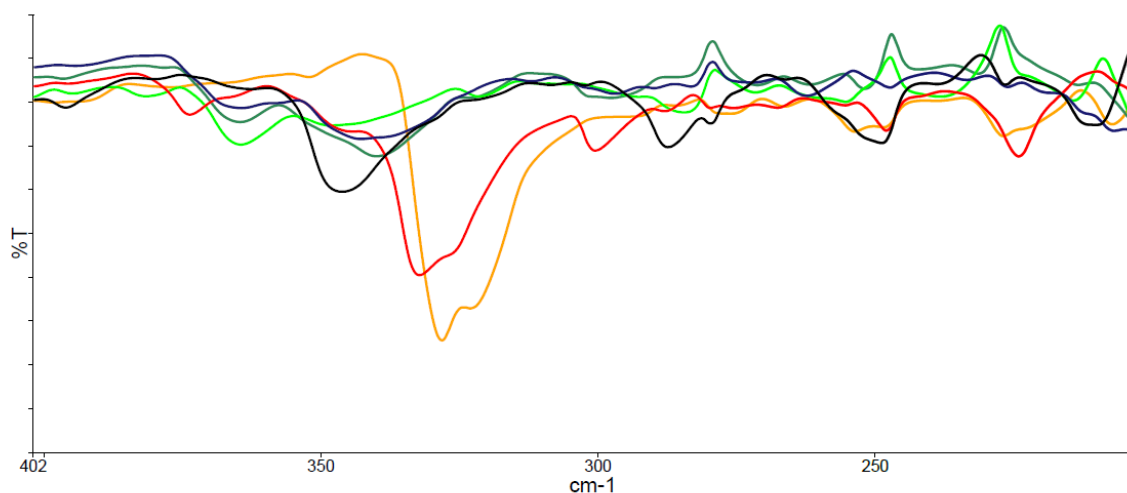

**Figure 2S.** Overlapped Far-IR spectra in the range 400-200  $\text{cm}^{-1}$  for  $\text{L}^{\text{COOMe}}$  (black line),  $\text{L}^{\text{COOMe}}\text{AuCl}$  (2) (red line),  $(\text{L}^{\text{COOMe}})_2\text{AuOTf}$  (5) (dark blue line),  $(\text{L}^{\text{COOMe}})_2\text{AuPF}_6$  (6) (dark green line),  $(\text{L}^{\text{COOMe}})_2\text{AuBAr}_4$  (7) (light green line),  $\text{PPh}_3\text{AuCl}$  (orange line). The  $\text{PPh}_3\text{PAuCl}$  was added as a reference for the stretching modes of the linear P-Au-Cl bonds.

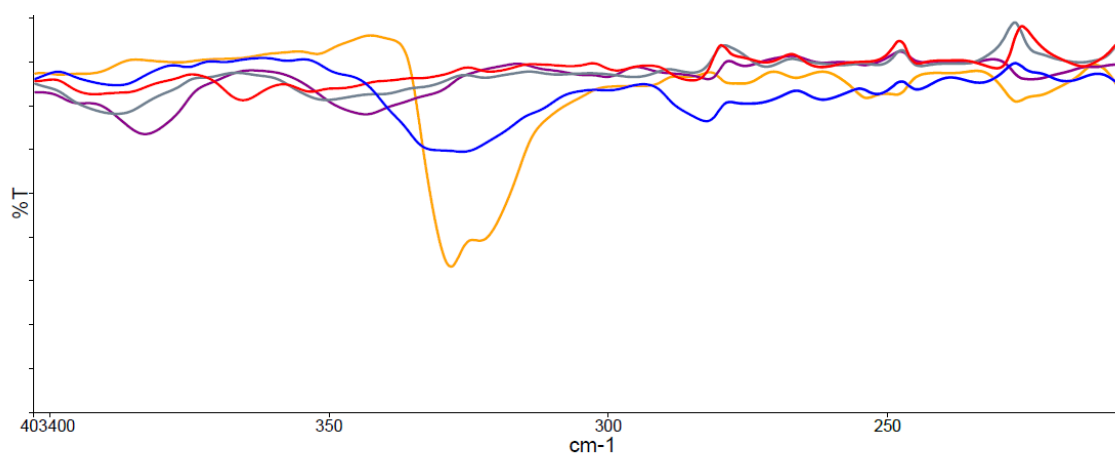

**Figure 3S.** Overlapped Far-IR spectra in the range 400-200  $\text{cm}^{-1}$  for  $\text{L}^{\text{COOEt}}$  (violet line),  $\text{L}^{\text{COOEt}}\text{AuCl}$  (**3**) (blue line),  $(\text{L}^{\text{COOEt}})_2\text{AuPF}_6$  (**8**) (grey line),  $(\text{L}^{\text{COOEt}})_2\text{AuBAR}_4$  (**9**) (red line).  $\text{PPh}_3\text{PAuCl}$  (orange line). The  $\text{PPh}_3\text{PAuCl}$  was added as a reference for the stretching modes of the linear P-Au-Cl bonds.

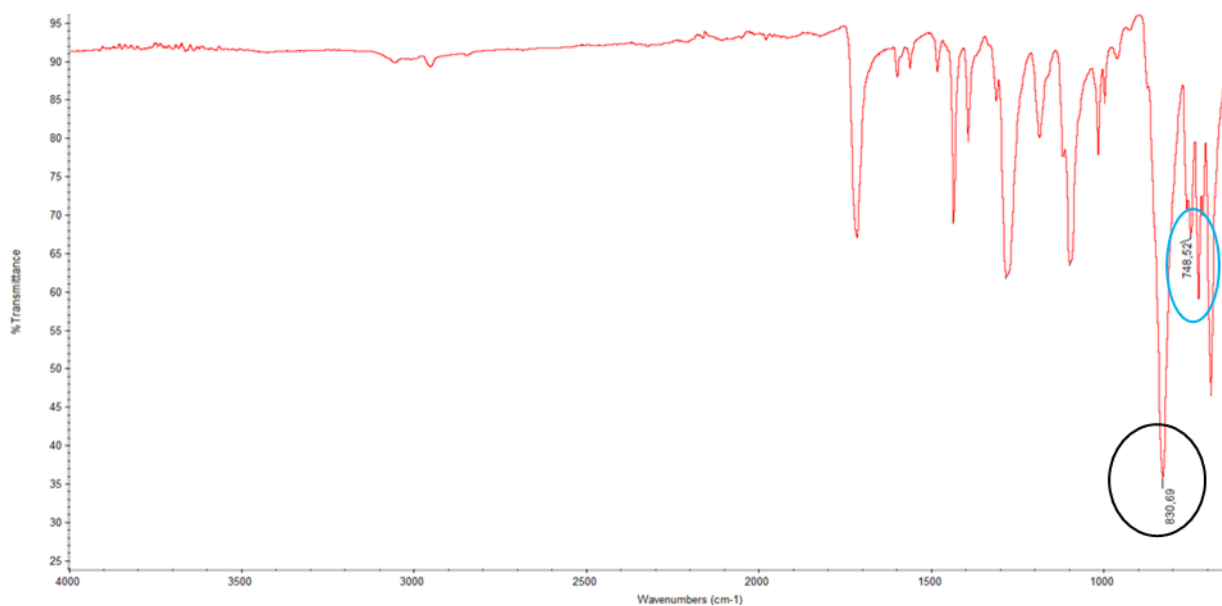

**Figure 4S.** Mid-IR spectrum of the complex  $(\text{L}^{\text{COOMe}})_2\text{AuPF}_6$  (**6**). The asymmetric and the symmetric stretching modes of  $\text{PF}_6^-$  are highlighted at 830  $\text{cm}^{-1}$  (black circle) and 748  $\text{cm}^{-1}$  (blue circle), respectively.

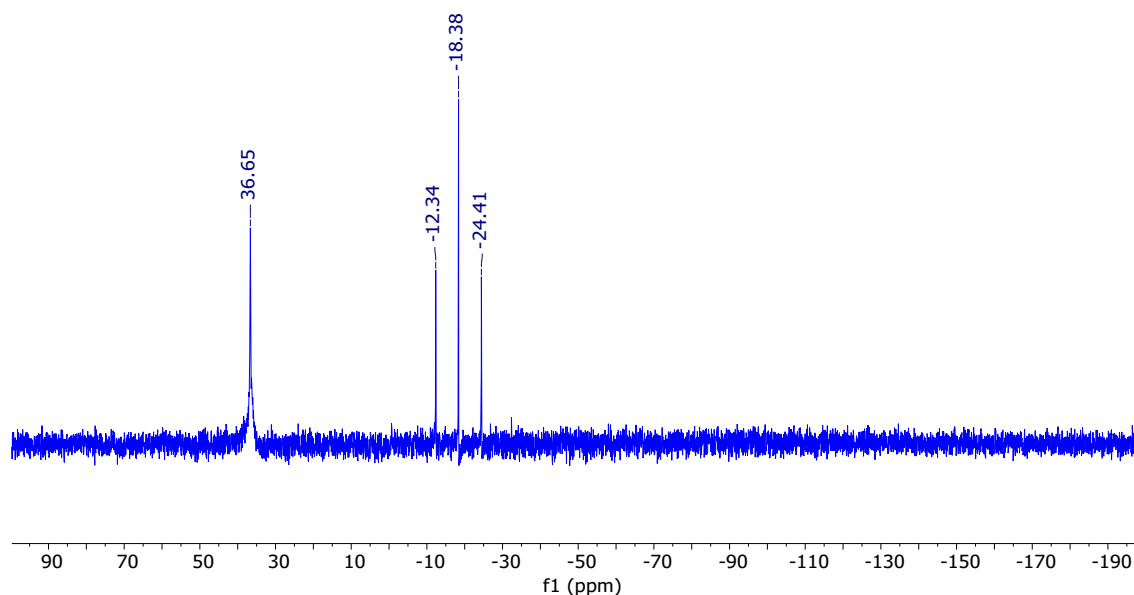

**Figure 5S.**  $^{31}\text{P}$  NMR of complex  $(\text{L}^{\text{COOMe}})_2\text{AuPF}_6$  (**6**) in  $\text{CDCl}_3$  at r. t., showing the complete hydrolysis of the  $\text{PF}_6^-$  to the  $\text{PO}_2\text{F}_2^-$  anion.

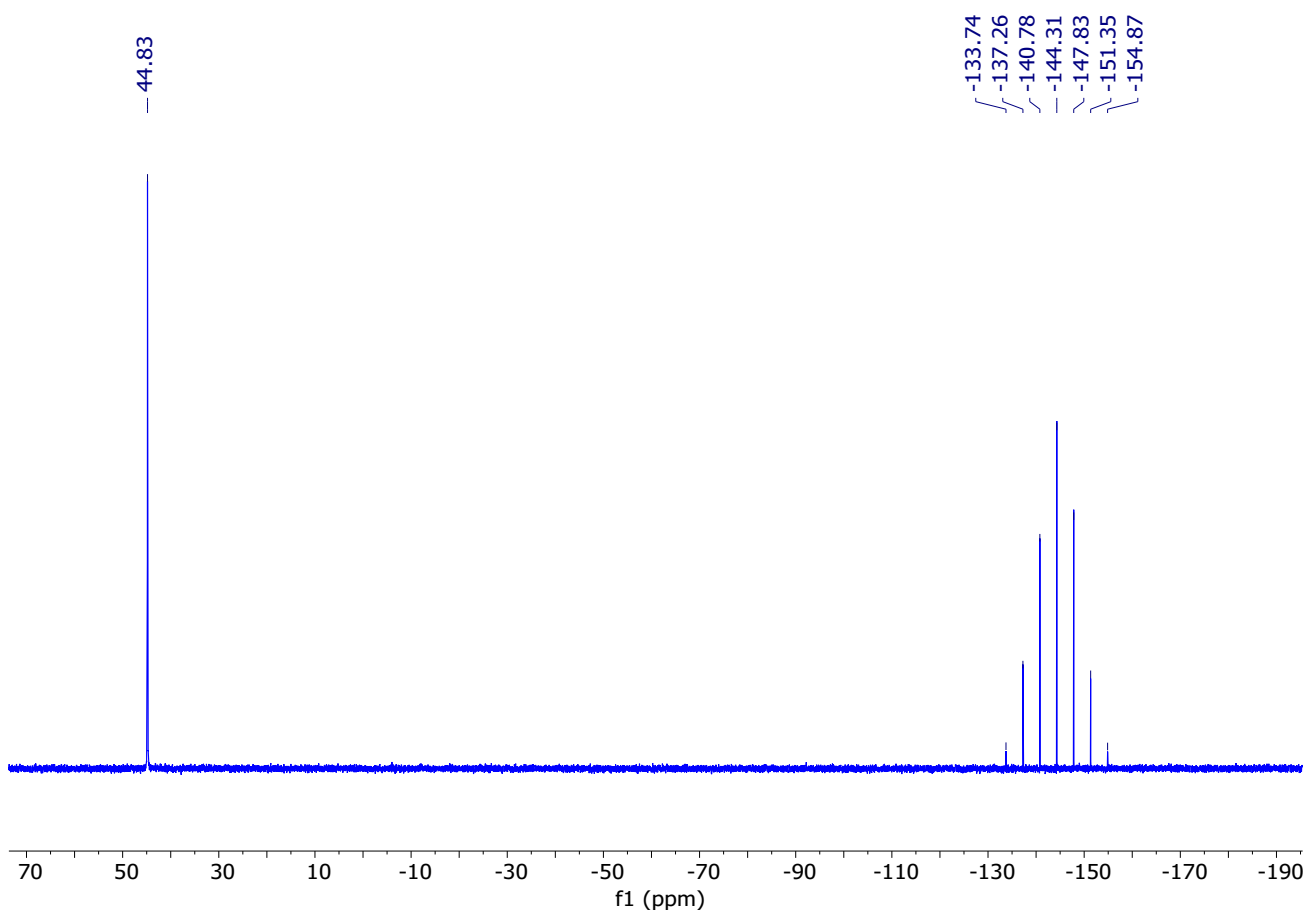

**Figure 6S.**  $^{31}\text{P}$  NMR of complex  $(\text{L}^{\text{COOEt}})_2\text{AuPF}_6$  (**8**) in  $\text{CDCl}_3$  at r. t.

**Table 2S.** Crystal data for compounds **1**, **2**, **4** and **7**.

| Compounds                        | <b>1</b>                                                                                                                      | <b>2</b>                                                                                                   | <b>4</b>                                                                                                   | <b>7</b>                                                                                               |
|----------------------------------|-------------------------------------------------------------------------------------------------------------------------------|------------------------------------------------------------------------------------------------------------|------------------------------------------------------------------------------------------------------------|--------------------------------------------------------------------------------------------------------|
| Formula                          | $\text{C}_{19}\text{H}_{15}\text{AuClO}_2\text{P}$                                                                            | $\text{C}_{20}\text{H}_{17}\text{AuClO}_2\text{P}$                                                         | $\text{C}_{38}\text{H}_{30}\text{AuClO}_4\text{P}_2\text{CH}_4\text{O}$                                    | $\text{C}_{72}\text{H}_{46}\text{AuBF}_{24}\text{O}_4\text{P}_2$                                       |
| Space group                      | $\text{P}\bar{1}$                                                                                                             | $\text{P}2_1/\text{c}$                                                                                     | $\text{C}2/\text{c}$                                                                                       | $\text{P}2_1/\text{c}$                                                                                 |
| Crystal system                   | Triclinic                                                                                                                     | Monoclinic                                                                                                 | Monoclinic                                                                                                 | Monoclinic                                                                                             |
| Cell length<br>(Å)               | <b>a</b> 12.2536(4)<br><b>b</b> 12.5439(4)<br><b>c</b> 13.9013(5)                                                             | <b>a</b> 11.7061(5)<br><b>b</b> 11.0279(4)<br><b>c</b> 15.3848(6)                                          | <b>a</b> 25.3936(11)<br><b>b</b> 11.0814(4)<br><b>c</b> 15.6192(6)                                         | <b>a</b> 24.900(6)<br><b>b</b> 16.943(3)<br><b>c</b> 17.711(5)                                         |
| Cell Angles<br>(°)               | <b><math>\alpha</math></b> 112.2670(10);<br><b><math>\beta</math></b> 91.5850(10);<br><b><math>\gamma</math></b> 109.1630(10) | <b><math>\alpha</math></b> 90;<br><b><math>\beta</math></b> 104.7930(10);<br><b><math>\gamma</math></b> 90 | <b><math>\alpha</math></b> 90;<br><b><math>\beta</math></b> 120.8470(10);<br><b><math>\gamma</math></b> 90 | <b><math>\alpha</math></b> 90<br><b><math>\beta</math></b> 106.237(7)<br><b><math>\gamma</math></b> 90 |
| Cell Volume<br>(Å <sup>3</sup> ) | 1839.36                                                                                                                       | 1920.25                                                                                                    | 3773.44                                                                                                    | 7173.9                                                                                                 |
| Units in cell                    | <b>Z:</b> 4 <b>Z':</b> 0                                                                                                      | <b>Z:</b> 4 <b>Z':</b> 0                                                                                   | <b>Z:</b> 4 <b>Z':</b> 0                                                                                   | <b>Z:</b> 4 <b>Z':</b> 0                                                                               |
| R factor                         | 3.14                                                                                                                          | 3.08                                                                                                       | 3.88                                                                                                       | 5.23                                                                                                   |
| Symmetry operations              |                                                                                                                               |                                                                                                            |                                                                                                            |                                                                                                        |

**Table 3S.** Bond length (Å) and angles (°) for compound **1**. Data were compared with those obtained in the literature by F. Mohr, M.C. Jennings, and R. J. Puddephatt, *Angew. Chem. Int. Ed.* 2004, **43**, 969. <https://doi.org/10.1002/anie.200353127>.

| Atom1 | Atom2 | Length   | Atom1 | Atom2 | Atom3 | Angle     |
|-------|-------|----------|-------|-------|-------|-----------|
| Au1   | Cl1   | 2.270(2) | Cl1   | Au1   | P1    | 177.72(6) |
| Au1   | P1    | 2.225(1) | Au1   | P1    | C1    | 112.7(2)  |
| P1    | C1    | 1.824(6) | Au1   | P1    | C7    | 112.7(2)  |
| P1    | C7    | 1.810(4) | Au1   | P1    | C13   | 114.2(2)  |
| P1    | C13   | 1.817(4) | C1    | P1    | C7    | 106.9(2)  |
| O1    | H1    | 0.6(1)   | C1    | P1    | C13   | 105.9(2)  |
| O1    | C19   | 1.269(9) | C7    | P1    | C13   | 103.7(2)  |
| O2    | C19   | 1.265(6) | H1    | O1    | C19   | 121(10)   |
| C1    | C2    | 1.369(9) | P1    | C1    | C2    | 117.4(5)  |
| C1    | C6    | 1.363(8) | P1    | C1    | C6    | 123.3(4)  |
| C2    | H2    | 0.93     | C2    | C1    | C6    | 119.3(6)  |
| C2    | C3    | 1.39(1)  | C1    | C2    | H2    | 120.5     |
| C3    | H3    | 0.93     | C1    | C2    | C3    | 119.1(7)  |
| C3    | C4    | 1.35(1)  | H2    | C2    | C3    | 120.5     |
| C4    | H4    | 0.93     | C2    | C3    | H3    | 119.6     |
| C4    | C5    | 1.353(9) | C2    | C3    | C4    | 120.9(8)  |
| C5    | H5    | 0.93     | H3    | C3    | C4    | 119.6     |
| C5    | C6    | 1.37(1)  | C3    | C4    | H4    | 120.1     |
| C6    | H6    | 0.93     | C3    | C4    | C5    | 119.8(7)  |
| C7    | C8    | 1.369(8) | H4    | C4    | C5    | 120.1     |
| C7    | C12   | 1.396(6) | C4    | C5    | H5    | 120       |
| C8    | H8    | 0.93     | C4    | C5    | C6    | 120.1(6)  |
| C8    | C9    | 1.393(8) | H5    | C5    | C6    | 119.9     |
| C9    | H9    | 0.93     | C1    | C6    | C5    | 120.8(6)  |
| C9    | C10   | 1.351(8) | C1    | C6    | H6    | 119.6     |
| C10   | H10   | 0.93     | C5    | C6    | H6    | 119.6     |
| C10   | C11   | 1.36(1)  | P1    | C7    | C8    | 122.5(4)  |
| C11   | H11   | 0.93     | P1    | C7    | C12   | 118.7(4)  |
| C11   | C12   | 1.379(8) | C8    | C7    | C12   | 118.8(5)  |
| C12   | H12   | 0.93     | C7    | C8    | H8    | 119.9     |
| C13   | C14   | 1.404(9) | C7    | C8    | C9    | 120.3(6)  |
| C13   | C18   | 1.383(6) | H8    | C8    | C9    | 119.8     |
| C14   | H14   | 0.929    | C8    | C9    | H9    | 120       |
| C14   | C15   | 1.368(8) | C8    | C9    | C10   | 120.0(6)  |
| C15   | H15   | 0.93     | H9    | C9    | C10   | 120       |
| C15   | C16   | 1.391(6) | C9    | C10   | H10   | 119.7     |
| C16   | C17   | 1.385(8) | C9    | C10   | C11   | 120.7(7)  |
| C16   | C19   | 1.473(7) | H10   | C10   | C11   | 119.6     |
| C17   | H17   | 0.93     | C10   | C11   | H11   | 119.8     |
| C17   | C18   | 1.388(8) | C10   | C11   | C12   | 120.2(6)  |
| C18   | H18   | 0.93     | H11   | C11   | C12   | 119.9     |
| Au2   | Cl2   | 2.266(1) | C7    | C12   | C11   | 119.9(6)  |

|      |      |          |      |      |     |           |
|------|------|----------|------|------|-----|-----------|
| Au2  | P2   | 2.225(1) | C7   | C12  | H12 | 120.1     |
| P2   | C20  | 1.813(6) | C11  | C12  | H12 | 120       |
| P2   | C26  | 1.823(5) | P1   | C13  | C14 | 117.1(4)  |
| P2   | C32  | 1.822(4) | P1   | C13  | C18 | 123.8(4)  |
| O3   | H3A  | 0.73(7)  | C14  | C13  | C18 | 119.0(4)  |
| O3   | C37  | 1.306(6) | C13  | C14  | H14 | 119.7     |
| O4   | C37  | 1.228(7) | C13  | C14  | C15 | 120.6(5)  |
| C00P | H00P | 0.93     | H14  | C14  | C15 | 119.7     |
| C00P | C32  | 1.374(7) | C14  | C15  | H15 | 119.8     |
| C00P | C36  | 1.378(7) | C14  | C15  | C16 | 120.3(5)  |
| C20  | C21  | 1.389(6) | H15  | C15  | C16 | 119.9     |
| C20  | C25  | 1.375(7) | C15  | C16  | C17 | 119.3(5)  |
| C21  | H21  | 0.931    | C15  | C16  | C19 | 119.9(4)  |
| C21  | C22  | 1.38(1)  | C17  | C16  | C19 | 120.7(4)  |
| C22  | H22  | 0.93     | C16  | C17  | H17 | 119.8     |
| C22  | C23  | 1.36(1)  | C16  | C17  | C18 | 120.5(5)  |
| C23  | H23  | 0.93     | H17  | C17  | C18 | 119.7     |
| C23  | C24  | 1.377(9) | C13  | C18  | C17 | 120.1(5)  |
| C24  | H24  | 0.93     | C13  | C18  | H18 | 120       |
| C24  | C25  | 1.37(1)  | C17  | C18  | H18 | 119.9     |
| C25  | H25  | 0.931    | O1   | C19  | O2  | 122.7(5)  |
| C26  | C27  | 1.375(9) | O1   | C19  | C16 | 118.0(5)  |
| C26  | C31  | 1.370(8) | O2   | C19  | C16 | 119.3(5)  |
| C27  | H27  | 0.93     | C12  | Au2  | P2  | 178.92(6) |
| C27  | C28  | 1.391(9) | Au2  | P2   | C20 | 113.3(2)  |
| C28  | H28  | 0.93     | Au2  | P2   | C26 | 112.7(2)  |
| C28  | C29  | 1.347(9) | Au2  | P2   | C32 | 112.6(2)  |
| C29  | H29  | 0.93     | C20  | P2   | C26 | 107.1(2)  |
| C29  | C30  | 1.38(1)  | C20  | P2   | C32 | 104.6(2)  |
| C30  | H30  | 0.93     | C26  | P2   | C32 | 105.9(2)  |
| C30  | C31  | 1.38(1)  | H3A  | O3   | C37 | 108(6)    |
| C31  | H31  | 0.93     | H00P | C00P | C32 | 119.6     |
| C32  | C33  | 1.390(8) | H00P | C00P | C36 | 119.6     |
| C33  | H33  | 0.93     | C32  | C00P | C36 | 120.8(5)  |
| C33  | C34  | 1.369(7) | P2   | C20  | C21 | 121.4(4)  |
| C34  | H34  | 0.93     | P2   | C20  | C25 | 119.5(4)  |
| C34  | C35  | 1.386(7) | C21  | C20  | C25 | 119.1(5)  |
| C35  | C36  | 1.394(8) | C20  | C21  | H21 | 120.2     |
| C35  | C37  | 1.476(6) | C20  | C21  | C22 | 119.7(5)  |
| C36  | H36  | 0.93     | H21  | C21  | C22 | 120.1     |
|      |      |          | C21  | C22  | H22 | 120.1     |
|      |      |          | C21  | C22  | C23 | 119.7(6)  |
|      |      |          | H22  | C22  | C23 | 120.2     |
|      |      |          | C22  | C23  | H23 | 119.4     |
|      |      |          | C22  | C23  | C24 | 121.2(7)  |
|      |      |          | H23  | C23  | C24 | 119.4     |
|      |      |          | C23  | C24  | H24 | 120.6     |
|      |      |          | C23  | C24  | C25 | 118.8(7)  |

|      |     |      |          |
|------|-----|------|----------|
| H24  | C24 | C25  | 120.6    |
| C20  | C25 | C24  | 121.5(6) |
| C20  | C25 | H25  | 119.3    |
| C24  | C25 | H25  | 119.2    |
| P2   | C26 | C27  | 121.7(4) |
| P2   | C26 | C31  | 118.7(4) |
| C27  | C26 | C31  | 119.6(5) |
| C26  | C27 | H27  | 120.1    |
| C26  | C27 | C28  | 119.7(5) |
| H27  | C27 | C28  | 120.2    |
| C27  | C28 | H28  | 119.7    |
| C27  | C28 | C29  | 120.7(6) |
| H28  | C28 | C29  | 119.7    |
| C28  | C29 | H29  | 120      |
| C28  | C29 | C30  | 120.0(7) |
| H29  | C29 | C30  | 119.9    |
| C29  | C30 | H30  | 120.2    |
| C29  | C30 | C31  | 119.7(7) |
| H30  | C30 | C31  | 120.2    |
| C26  | C31 | C30  | 120.3(6) |
| C26  | C31 | H31  | 119.9    |
| C30  | C31 | H31  | 119.8    |
| P2   | C32 | C00P | 123.5(4) |
| P2   | C32 | C33  | 117.4(4) |
| C00P | C32 | C33  | 119.1(5) |
| C32  | C33 | H33  | 119.7    |
| C32  | C33 | C34  | 120.7(5) |
| H33  | C33 | C34  | 119.7    |
| C33  | C34 | H34  | 119.9    |
| C33  | C34 | C35  | 120.2(5) |
| H34  | C34 | C35  | 119.9    |
| C34  | C35 | C36  | 119.3(5) |
| C34  | C35 | C37  | 119.3(4) |
| C36  | C35 | C37  | 121.4(4) |
| C00P | C36 | C35  | 119.8(5) |
| C00P | C36 | H36  | 120.1    |
| C35  | C36 | H36  | 120      |
| O3   | C37 | O4   | 122.6(5) |
| O3   | C37 | C35  | 115.7(4) |
| O4   | C37 | C35  | 121.7(4) |

**Table 4S.** Bond length (Å) and angles (°) for compound **2**.

| Atom1 | Atom2 | Length   | Atom1 | Atom2 | Atom3 | Angle     |
|-------|-------|----------|-------|-------|-------|-----------|
| Au1   | Cl1   | 2.284(2) | Cl1   | Au1   | P1    | 177.35(5) |
| Au1   | P1    | 2.231(1) | Au1   | P1    | C1    | 110.4(2)  |
| P1    | C1    | 1.813(5) | Au1   | P1    | C7    | 114.3(2)  |
| P1    | C7    | 1.821(5) | Au1   | P1    | C13   | 113.9(2)  |



|     |      |          |     |     |     |          |
|-----|------|----------|-----|-----|-----|----------|
| P1  | C13  | 1.811(4) | C1  | P1  | C7  | 105.3(2) |
| O1  | C19  | 1.195(6) | C1  | P1  | C13 | 106.6(2) |
| O2  | C19  | 1.316(6) | C7  | P1  | C13 | 105.7(2) |
| O2  | C20  | 1.456(7) | C19 | O2  | C20 | 116.4(4) |
| C1  | C2   | 1.367(7) | P1  | C1  | C2  | 123.2(4) |
| C1  | C6   | 1.379(6) | P1  | C1  | C6  | 117.7(4) |
| C2  | H2   | 0.93     | C2  | C1  | C6  | 119.0(5) |
| C2  | C3   | 1.378(8) | C1  | C2  | H2  | 119.9    |
| C3  | H3   | 0.931    | C1  | C2  | C3  | 120.0(6) |
| C3  | C4   | 1.34(1)  | H2  | C2  | C3  | 120      |
| C4  | H4   | 0.93     | C2  | C3  | H3  | 119.1    |
| C4  | C5   | 1.38(1)  | C2  | C3  | C4  | 121.8(7) |
| C5  | H5   | 0.93     | H3  | C3  | C4  | 119.1    |
| C5  | C6   | 1.389(8) | C3  | C4  | H4  | 120.4    |
| C6  | H6   | 0.931    | C3  | C4  | C5  | 119.2(7) |
| C7  | C8   | 1.365(8) | H4  | C4  | C5  | 120.4    |
| C7  | C12  | 1.388(7) | C4  | C5  | H5  | 120.3    |
| C8  | H8   | 0.93     | C4  | C5  | C6  | 119.5(6) |
| C8  | C9   | 1.39(1)  | H5  | C5  | C6  | 120.3    |
| C9  | H9   | 0.93     | C1  | C6  | C5  | 120.5(5) |
| C9  | C10  | 1.36(1)  | C1  | C6  | H6  | 119.7    |
| C10 | H10  | 0.93     | C5  | C6  | H6  | 119.8    |
| C10 | C11  | 1.36(1)  | P1  | C7  | C8  | 118.6(4) |
| C11 | H11  | 0.931    | P1  | C7  | C12 | 122.4(4) |
| C11 | C12  | 1.374(9) | C8  | C7  | C12 | 119.1(5) |
| C12 | H12  | 0.931    | C7  | C8  | H8  | 120      |
| C13 | C14  | 1.388(7) | C7  | C8  | C9  | 119.9(6) |
| C13 | C18  | 1.390(7) | H8  | C8  | C9  | 120.1    |
| C14 | H14  | 0.93     | C8  | C9  | H9  | 119.7    |
| C14 | C15  | 1.377(6) | C8  | C9  | C10 | 120.7(7) |
| C15 | H15  | 0.93     | H9  | C9  | C10 | 119.6    |
| C15 | C16  | 1.383(6) | C9  | C10 | H10 | 120.2    |
| C16 | C17  | 1.386(7) | C9  | C10 | C11 | 119.6(7) |
| C16 | C19  | 1.492(6) | H10 | C10 | C11 | 120.2    |
| C17 | H17  | 0.93     | C10 | C11 | H11 | 119.5    |
| C17 | C18  | 1.384(6) | C10 | C11 | C12 | 120.9(6) |
| C18 | H18  | 0.93     | H11 | C11 | C12 | 119.6    |
| C20 | H20A | 0.96     | C7  | C12 | C11 | 119.8(5) |
| C20 | H20B | 0.96     | C7  | C12 | H12 | 120.1    |
| C20 | H20C | 0.959    | C11 | C12 | H12 | 120.1    |
|     |      |          | P1  | C13 | C14 | 120.0(3) |
|     |      |          | P1  | C13 | C18 | 121.1(4) |
|     |      |          | C14 | C13 | C18 | 118.9(4) |
|     |      |          | C13 | C14 | H14 | 119.7    |
|     |      |          | C13 | C14 | C15 | 120.5(4) |
|     |      |          | H14 | C14 | C15 | 119.8    |
|     |      |          | C14 | C15 | H15 | 119.8    |
|     |      |          | C14 | C15 | C16 | 120.4(4) |

|      |     |      |          |
|------|-----|------|----------|
| H15  | C15 | C16  | 119.8    |
| C15  | C16 | C17  | 119.7(4) |
| C15  | C16 | C19  | 117.8(4) |
| C17  | C16 | C19  | 122.5(4) |
| C16  | C17 | H17  | 120.1    |
| C16  | C17 | C18  | 119.8(4) |
| H17  | C17 | C18  | 120.1    |
| C13  | C18 | C17  | 120.7(5) |
| C13  | C18 | H18  | 119.7    |
| C17  | C18 | H18  | 119.7    |
| O1   | C19 | O2   | 124.1(5) |
| O1   | C19 | C16  | 124.1(4) |
| O2   | C19 | C16  | 111.8(4) |
| O2   | C20 | H20A | 109.5    |
| O2   | C20 | H20B | 109.4    |
| O2   | C20 | H20C | 109.5    |
| H20A | C20 | H20B | 109.4    |
| H20A | C20 | H20C | 109.5    |
| H20B | C20 | H20C | 109.5    |

**Table 5S.** Bond length (Å) and angles (°) for compound 4.

| Atom1 | Atom2 | Length   | Atom1 | Atom2 | Atom3 | Angle    |
|-------|-------|----------|-------|-------|-------|----------|
| Au1   | Cl1   | 2.858    | Cl1   | Au1   | P1    | 100.44   |
| Au1   | P1    | 2.307    | Cl1   | Au1   | P1    | 100.44   |
| Au1   | P1    | 2.307    | P1    | Au1   | P1    | 159.12   |
| P1    | C1    | 1.825(6) | Au1   | P1    | C1    | 116.4    |
| P1    | C8    | 1.818(7) | Au1   | P1    | C8    | 110.4    |
| P1    | C14   | 1.809(5) | Au1   | P1    | C14   | 110.9    |
| O1    | H1    | 0.821    | C1    | P1    | C8    | 106.0(2) |
| O1    | C7    | 1.324(9) | C1    | P1    | C14   | 106.1(2) |
| O2    | C7    | 1.206(7) | C8    | P1    | C14   | 106.5(2) |
| C1    | C2    | 1.39(1)  | H1    | O1    | C7    | 109.5    |
| C1    | C6    | 1.401(7) | P1    | C1    | C2    | 119.0(4) |
| C2    | H2    | 0.93     | P1    | C1    | C6    | 121.6(4) |
| C2    | C3    | 1.38(1)  | C2    | C1    | C6    | 119.4(5) |
| C3    | H3    | 0.929    | C1    | C2    | H2    | 120.3    |
| C3    | C4    | 1.368(8) | C1    | C2    | C3    | 119.4(6) |
| C4    | C5    | 1.38(1)  | H2    | C2    | C3    | 120.3    |
| C4    | C7    | 1.501(9) | C2    | C3    | H3    | 119.1    |
| C5    | H5    | 0.931    | C2    | C3    | C4    | 121.7(7) |
| C5    | C6    | 1.385(8) | H3    | C3    | C4    | 119.2    |
| C6    | H6    | 0.93     | C3    | C4    | C5    | 119.1(6) |
| C8    | C9    | 1.371(9) | C3    | C4    | C7    | 122.1(6) |
| C8    | C13   | 1.384(7) | C5    | C4    | C7    | 118.8(6) |
| C9    | H9    | 0.93     | C4    | C5    | H5    | 119.6    |
| C9    | C10   | 1.38(1)  | C4    | C5    | C6    | 120.9(6) |
| C10   | H10   | 0.93     | H5    | C5    | C6    | 119.4    |

|     |     |          |     |     |     |          |
|-----|-----|----------|-----|-----|-----|----------|
| C10 | C11 | 1.374(9) | C1  | C6  | C5  | 119.4(6) |
| C11 | H11 | 0.93     | C1  | C6  | H6  | 120.3    |
| C11 | C12 | 1.36(1)  | C5  | C6  | H6  | 120.3    |
| C12 | H12 | 0.93     | O1  | C7  | O2  | 124.5(7) |
| C12 | C13 | 1.39(1)  | O1  | C7  | C4  | 112.2(6) |
| C13 | H13 | 0.93     | O2  | C7  | C4  | 123.2(6) |
| C14 | C15 | 1.390(9) | P1  | C8  | C9  | 118.6(4) |
| C14 | C19 | 1.390(8) | P1  | C8  | C13 | 121.8(5) |
| C15 | H15 | 0.93     | C9  | C8  | C13 | 119.5(6) |
| C15 | C16 | 1.40(1)  | C8  | C9  | H9  | 119.6    |
| C16 | H16 | 0.931    | C8  | C9  | C10 | 120.8(6) |
| C16 | C17 | 1.36(1)  | H9  | C9  | C10 | 119.6    |
| C17 | H17 | 0.93     | C9  | C10 | H10 | 120.4    |
| C17 | C18 | 1.36(1)  | C9  | C10 | C11 | 119.4(7) |
| C18 | H18 | 0.93     | H10 | C10 | C11 | 120.2    |
| C18 | C19 | 1.406(9) | C10 | C11 | H11 | 119.8    |
| C19 | H19 | 0.93     | C10 | C11 | C12 | 120.5(7) |
| P1  | C1  | 1.825(6) | H11 | C11 | C12 | 119.7    |
| P1  | C8  | 1.818(7) | C11 | C12 | H12 | 119.9    |
| P1  | C14 | 1.809(5) | C11 | C12 | C13 | 120.2(7) |
| O1  | H1  | 0.821    | H12 | C12 | C13 | 119.9    |
| O1  | C7  | 1.324(9) | C8  | C13 | C12 | 119.5(7) |
| O2  | C7  | 1.206(7) | C8  | C13 | H13 | 120.3    |
| C1  | C2  | 1.39(1)  | C12 | C13 | H13 | 120.2    |
| C1  | C6  | 1.401(7) | P1  | C14 | C15 | 122.9(4) |
| C2  | H2  | 0.93     | P1  | C14 | C19 | 118.1(4) |
| C2  | C3  | 1.38(1)  | C15 | C14 | C19 | 118.9(5) |
| C3  | H3  | 0.929    | C14 | C15 | H15 | 120.2    |
| C3  | C4  | 1.368(8) | C14 | C15 | C16 | 119.5(6) |
| C4  | C5  | 1.38(1)  | H15 | C15 | C16 | 120.3    |
| C4  | C7  | 1.501(9) | C15 | C16 | H16 | 119.4    |
| C5  | H5  | 0.931    | C15 | C16 | C17 | 121.1(7) |
| C5  | C6  | 1.385(8) | H16 | C16 | C17 | 119.4    |
| C6  | H6  | 0.93     | C16 | C17 | H17 | 119.8    |
| C8  | C9  | 1.371(9) | C16 | C17 | C18 | 120.3(7) |
| C8  | C13 | 1.384(7) | H17 | C17 | C18 | 119.8    |
| C9  | H9  | 0.93     | C17 | C18 | H18 | 120      |
| C9  | C10 | 1.38(1)  | C17 | C18 | C19 | 120.1(7) |
| C10 | H10 | 0.93     | H18 | C18 | C19 | 119.9    |
| C10 | C11 | 1.374(9) | C14 | C19 | C18 | 120.1(6) |
| C11 | H11 | 0.93     | C14 | C19 | H19 | 119.9    |
| C11 | C12 | 1.36(1)  | C18 | C19 | H19 | 120      |
| C12 | H12 | 0.93     | Au1 | P1  | C1  | 116.4    |
| C12 | C13 | 1.39(1)  | Au1 | P1  | C8  | 110.4    |
| C13 | H13 | 0.93     | Au1 | P1  | C14 | 110.9    |
| C14 | C15 | 1.390(9) | C1  | P1  | C8  | 106.0(2) |
| C14 | C19 | 1.390(8) | C1  | P1  | C14 | 106.1(2) |
| C15 | H15 | 0.93     | C8  | P1  | C14 | 106.5(2) |

|     |      |          |     |     |     |          |
|-----|------|----------|-----|-----|-----|----------|
| C15 | C16  | 1.40(1)  | H1  | O1  | C7  | 109.5    |
| C16 | H16  | 0.931    | P1  | C1  | C2  | 119.0(4) |
| C16 | C17  | 1.36(1)  | P1  | C1  | C6  | 121.6(4) |
| C17 | H17  | 0.93     | C2  | C1  | C6  | 119.4(5) |
| C17 | C18  | 1.36(1)  | C1  | C2  | H2  | 120.3    |
| C18 | H18  | 0.93     | C1  | C2  | C3  | 119.4(6) |
| C18 | C19  | 1.406(9) | H2  | C2  | C3  | 120.3    |
| C19 | H19  | 0.93     | C2  | C3  | H3  | 119.1    |
| O3  | H3A  | 0.819    | C2  | C3  | C4  | 121.7(7) |
| O3  | C20  | 1.32(1)  | H3  | C3  | C4  | 119.2    |
| C20 | H20A | 0.96     | C3  | C4  | C5  | 119.1(6) |
| C20 | H20B | 0.96     | C3  | C4  | C7  | 122.1(6) |
| C20 | H20C | 0.96     | C5  | C4  | C7  | 118.8(6) |
|     |      |          | C4  | C5  | H5  | 119.6    |
|     |      |          | C4  | C5  | C6  | 120.9(6) |
|     |      |          | H5  | C5  | C6  | 119.4    |
|     |      |          | C1  | C6  | C5  | 119.4(6) |
|     |      |          | C1  | C6  | H6  | 120.3    |
|     |      |          | C5  | C6  | H6  | 120.3    |
|     |      |          | O1  | C7  | O2  | 124.5(7) |
|     |      |          | O1  | C7  | C4  | 112.2(6) |
|     |      |          | O2  | C7  | C4  | 123.2(6) |
|     |      |          | P1  | C8  | C9  | 118.6(4) |
|     |      |          | P1  | C8  | C13 | 121.8(5) |
|     |      |          | C9  | C8  | C13 | 119.5(6) |
|     |      |          | C8  | C9  | H9  | 119.6    |
|     |      |          | C8  | C9  | C10 | 120.8(6) |
|     |      |          | H9  | C9  | C10 | 119.6    |
|     |      |          | C9  | C10 | H10 | 120.4    |
|     |      |          | C9  | C10 | C11 | 119.4(7) |
|     |      |          | H10 | C10 | C11 | 120.2    |
|     |      |          | C10 | C11 | H11 | 119.8    |
|     |      |          | C10 | C11 | C12 | 120.5(7) |
|     |      |          | H11 | C11 | C12 | 119.7    |
|     |      |          | C11 | C12 | H12 | 119.9    |
|     |      |          | C11 | C12 | C13 | 120.2(7) |
|     |      |          | H12 | C12 | C13 | 119.9    |
|     |      |          | C8  | C13 | C12 | 119.5(7) |
|     |      |          | C8  | C13 | H13 | 120.3    |
|     |      |          | C12 | C13 | H13 | 120.2    |
|     |      |          | P1  | C14 | C15 | 122.9(4) |
|     |      |          | P1  | C14 | C19 | 118.1(4) |
|     |      |          | C15 | C14 | C19 | 118.9(5) |
|     |      |          | C14 | C15 | H15 | 120.2    |
|     |      |          | C14 | C15 | C16 | 119.5(6) |
|     |      |          | H15 | C15 | C16 | 120.3    |
|     |      |          | C15 | C16 | H16 | 119.4    |
|     |      |          | C15 | C16 | C17 | 121.1(7) |

|      |     |      |          |
|------|-----|------|----------|
| H16  | C16 | C17  | 119.4    |
| C16  | C17 | H17  | 119.8    |
| C16  | C17 | C18  | 120.3(7) |
| H17  | C17 | C18  | 119.8    |
| C17  | C18 | H18  | 120      |
| C17  | C18 | C19  | 120.1(7) |
| H18  | C18 | C19  | 119.9    |
| C14  | C19 | C18  | 120.1(6) |
| C14  | C19 | H19  | 119.9    |
| C18  | C19 | H19  | 120      |
| H3A  | O3  | C20  | 109.5    |
| O3   | C20 | H20A | 110      |
| O3   | C20 | H20B | 109      |
| O3   | C20 | H20C | 109      |
| H20A | C20 | H20B | 110      |
| H20A | C20 | H20C | 109      |
| H20B | C20 | H20C | 109      |

**Table 6S.** Bond length (Å) and angles (°) for compound 7.

| Atom1 | Atom2 | Length   | Atom1 | Atom2 | Atom3 | Angle    |
|-------|-------|----------|-------|-------|-------|----------|
| C1    | C2    | 1.372(9) | C2    | C1    | C6    | 118.5(6) |
| C1    | C6    | 1.375(9) | C2    | C1    | P1    | 118.7(5) |
| C1    | P1    | 1.803(6) | C6    | C1    | P1    | 122.8(5) |
| C2    | H2    | 0.931    | C1    | C2    | H2    | 120      |
| C2    | C3    | 1.38(1)  | C1    | C2    | C3    | 120.2(7) |
| C3    | H3    | 0.93     | H2    | C2    | C3    | 119.8    |
| C3    | C4    | 1.37(1)  | C2    | C3    | H3    | 120      |
| C4    | H4    | 0.93     | C2    | C3    | C4    | 120.0(8) |
| C4    | C5    | 1.34(1)  | H3    | C3    | C4    | 120.1    |
| C5    | H5    | 0.931    | C3    | C4    | H4    | 120.4    |
| C5    | C6    | 1.35(1)  | C3    | C4    | C5    | 119.0(8) |
| C6    | H6    | 0.93     | H4    | C4    | C5    | 120.6    |
| C7    | C8    | 1.38(1)  | C4    | C5    | H5    | 118.9    |
| C7    | C12   | 1.37(1)  | C4    | C5    | C6    | 121.9(8) |
| C7    | P1    | 1.821(7) | H5    | C5    | C6    | 119.2    |
| C8    | H8    | 0.93     | C1    | C6    | C5    | 120.3(6) |
| C8    | C9    | 1.39(1)  | C1    | C6    | H6    | 119.9    |
| C9    | H9    | 0.93     | C5    | C6    | H6    | 119.9    |
| C9    | C10   | 1.32(2)  | C8    | C7    | C12   | 120.4(7) |
| C10   | C11   | 1.36(2)  | C8    | C7    | P1    | 122.4(6) |
| C10   | C39   | 1.55(2)  | C12   | C7    | P1    | 117.2(6) |
| C11   | H11   | 0.93     | C7    | C8    | H8    | 120.2    |
| C11   | C12   | 1.41(1)  | C7    | C8    | C9    | 119.6(7) |
| C12   | H12   | 0.93     | H8    | C8    | C9    | 120.2    |
| C13   | C14   | 1.37(1)  | C8    | C9    | H9    | 119.7    |
| C13   | C18   | 1.386(9) | C8    | C9    | C10   | 120.4(9) |
| C13   | P1    | 1.801(7) | H9    | C9    | C10   | 120      |

|     |      |          |     |     |     |          |
|-----|------|----------|-----|-----|-----|----------|
| C14 | H14  | 0.93     | C9  | C10 | C11 | 121(1)   |
| C14 | C15  | 1.38(1)  | C9  | C10 | C39 | 122(1)   |
| C15 | H15  | 0.93     | C11 | C10 | C39 | 117(1)   |
| C15 | C16  | 1.36(1)  | C10 | C11 | H11 | 120      |
| C16 | H16  | 0.931    | C10 | C11 | C12 | 120.5(9) |
| C16 | C17  | 1.36(1)  | H11 | C11 | C12 | 119.7    |
| C17 | H17  | 0.931    | C7  | C12 | C11 | 117.7(8) |
| C17 | C18  | 1.39(1)  | C7  | C12 | H12 | 121.1    |
| C18 | H18  | 0.931    | C11 | C12 | H12 | 121.1    |
| C19 | C20  | 1.370(7) | C14 | C13 | C18 | 118.8(7) |
| C19 | C24  | 1.378(8) | C14 | C13 | P1  | 119.1(6) |
| C19 | P2   | 1.815(6) | C18 | C13 | P1  | 122.1(6) |
| C20 | H20  | 0.93     | C13 | C14 | H14 | 119.7    |
| C20 | C21  | 1.390(9) | C13 | C14 | C15 | 120.7(7) |
| C21 | H21  | 0.93     | H14 | C14 | C15 | 119.6    |
| C21 | C22  | 1.373(8) | C14 | C15 | H15 | 120.1    |
| C22 | C23  | 1.386(8) | C14 | C15 | C16 | 119.8(9) |
| C22 | C37  | 1.485(9) | H15 | C15 | C16 | 120.1    |
| C23 | H23  | 0.929    | C15 | C16 | H16 | 120      |
| C23 | C24  | 1.37(1)  | C15 | C16 | C17 | 120.7(9) |
| C24 | H24  | 0.93     | H16 | C16 | C17 | 120      |
| C25 | C26  | 1.37(1)  | C16 | C17 | H17 | 120      |
| C25 | C30  | 1.37(1)  | C16 | C17 | C18 | 119.8(9) |
| C25 | P2   | 1.807(5) | H17 | C17 | C18 | 120.2    |
| C26 | H26  | 0.929    | C13 | C18 | C17 | 120.1(7) |
| C26 | C27  | 1.38(1)  | C13 | C18 | H18 | 119.9    |
| C27 | H27  | 0.93     | C17 | C18 | H18 | 120      |
| C27 | C28  | 1.37(1)  | C20 | C19 | C24 | 119.0(5) |
| C28 | H28  | 0.93     | C20 | C19 | P2  | 123.2(4) |
| C28 | C29  | 1.38(1)  | C24 | C19 | P2  | 117.8(4) |
| C29 | H29  | 0.93     | C19 | C20 | H20 | 119.8    |
| C29 | C30  | 1.36(1)  | C19 | C20 | C21 | 120.4(5) |
| C30 | H30  | 0.93     | H20 | C20 | C21 | 119.8    |
| C31 | C32  | 1.38(1)  | C20 | C21 | H21 | 120.1    |
| C31 | C36  | 1.372(9) | C20 | C21 | C22 | 119.9(6) |
| C31 | P2   | 1.798(5) | H21 | C21 | C22 | 120      |
| C32 | H32  | 0.93     | C21 | C22 | C23 | 119.9(5) |
| C32 | C33  | 1.36(1)  | C21 | C22 | C37 | 118.1(5) |
| C33 | H33  | 0.931    | C23 | C22 | C37 | 122.0(5) |
| C33 | C34  | 1.35(1)  | C22 | C23 | H23 | 120.3    |
| C34 | H34  | 0.93     | C22 | C23 | C24 | 119.2(6) |
| C34 | C35  | 1.36(1)  | H23 | C23 | C24 | 120.5    |
| C35 | H35  | 0.93     | C19 | C24 | C23 | 121.5(6) |
| C35 | C36  | 1.39(1)  | C19 | C24 | H24 | 119.4    |
| C36 | H36  | 0.931    | C23 | C24 | H24 | 119.1    |
| C37 | O1   | 1.188(8) | C26 | C25 | C30 | 119.0(7) |
| C37 | O2   | 1.315(8) | C26 | C25 | P2  | 118.5(5) |
| C38 | H38A | 0.96     | C30 | C25 | P2  | 122.4(5) |

|     |      |          |      |     |      |          |
|-----|------|----------|------|-----|------|----------|
| C38 | H38B | 0.959    | C25  | C26 | H26  | 119.6    |
| C38 | H38C | 0.96     | C25  | C26 | C27  | 120.7(8) |
| C38 | O2   | 1.45(1)  | H26  | C26 | C27  | 119.7    |
| C39 | O3   | 1.25(2)  | C26  | C27 | H27  | 120      |
| C39 | O4   | 1.23(2)  | C26  | C27 | C28  | 119.2(9) |
| C40 | H40A | 0.96     | H27  | C27 | C28  | 120      |
| C40 | H40B | 0.96     | C27  | C28 | H28  | 120      |
| C40 | H40C | 0.96     | C27  | C28 | C29  | 120.2(9) |
| C40 | O4   | 1.50(1)  | H28  | C28 | C29  | 120      |
| Au  | P1   | 2.303(2) | C28  | C29 | H29  | 120.3    |
| Au  | P2   | 2.303(2) | C28  | C29 | C30  | 119.4(8) |
| C41 | C42  | 1.381(7) | H29  | C29 | C30  | 120.3    |
| C41 | C46  | 1.384(8) | C25  | C30 | C29  | 121.4(7) |
| C41 | B    | 1.64(1)  | C25  | C30 | H30  | 119.3    |
| C42 | H42  | 0.929    | C29  | C30 | H30  | 119.3    |
| C42 | C43  | 1.39(1)  | C32  | C31 | C36  | 118.8(6) |
| C43 | C44  | 1.376(9) | C32  | C31 | P2   | 120.4(4) |
| C43 | C47  | 1.47(1)  | C36  | C31 | P2   | 120.8(4) |
| C44 | H44  | 0.931    | C31  | C32 | H32  | 119.8    |
| C44 | C45  | 1.37(1)  | C31  | C32 | C33  | 120.4(7) |
| C45 | C46  | 1.39(1)  | H32  | C32 | C33  | 119.8    |
| C45 | C48  | 1.49(1)  | C32  | C33 | H33  | 119.6    |
| C46 | H46  | 0.93     | C32  | C33 | C34  | 121.0(7) |
| C47 | F13  | 1.23(1)  | H33  | C33 | C34  | 119.4    |
| C47 | F14  | 1.25(1)  | C33  | C34 | H34  | 120.3    |
| C47 | F15  | 1.27(1)  | C33  | C34 | C35  | 119.5(7) |
| C48 | F10  | 1.26(1)  | H34  | C34 | C35  | 120.2    |
| C48 | F11  | 1.38(1)  | C34  | C35 | H35  | 119.8    |
| C48 | F12  | 1.29(1)  | C34  | C35 | C36  | 120.5(7) |
| C49 | C50  | 1.417(9) | H35  | C35 | C36  | 119.7    |
| C49 | C54  | 1.374(7) | C31  | C36 | C35  | 119.9(6) |
| C49 | B    | 1.640(9) | C31  | C36 | H36  | 120.1    |
| C50 | H50  | 0.929    | C35  | C36 | H36  | 120      |
| C50 | C51  | 1.38(1)  | C22  | C37 | O1   | 123.7(6) |
| C51 | C52  | 1.37(1)  | C22  | C37 | O2   | 112.5(6) |
| C51 | C56  | 1.49(2)  | O1   | C37 | O2   | 123.9(7) |
| C52 | H52  | 0.93     | H38A | C38 | H38B | 109.6    |
| C52 | C53  | 1.36(1)  | H38A | C38 | H38C | 109.5    |
| C53 | C54  | 1.401(9) | H38A | C38 | O2   | 109.4    |
| C53 | C55  | 1.48(1)  | H38B | C38 | H38C | 109.5    |
| C54 | H54  | 0.93     | H38B | C38 | O2   | 109.4    |
| C55 | F16  | 1.31(1)  | H38C | C38 | O2   | 109.4    |
| C55 | F17  | 1.32(1)  | C10  | C39 | O3   | 115(1)   |
| C55 | F18  | 1.32(1)  | C10  | C39 | O4   | 114(1)   |
| C56 | F19  | 1.23(1)  | O3   | C39 | O4   | 131(2)   |
| C56 | F20  | 1.24(1)  | H40A | C40 | H40B | 109      |
| C56 | F21  | 1.28(2)  | H40A | C40 | H40C | 109      |
| C57 | C58  | 1.397(8) | H40A | C40 | O4   | 109      |

|     |     |          |      |     |      |           |
|-----|-----|----------|------|-----|------|-----------|
| C57 | C62 | 1.408(7) | H40B | C40 | H40C | 110       |
| C57 | B   | 1.638(8) | H40B | C40 | O4   | 109       |
| C58 | H58 | 0.93     | H40C | C40 | O4   | 109       |
| C58 | C59 | 1.390(8) | P1   | Au  | P2   | 177.82(6) |
| C59 | C60 | 1.37(1)  | C37  | O2  | C38  | 115.4(6)  |
| C59 | C64 | 1.46(1)  | C39  | O4  | C40  | 110(1)    |
| C60 | H60 | 0.931    | C1   | P1  | C7   | 108.2(3)  |
| C60 | C61 | 1.37(1)  | C1   | P1  | C13  | 105.8(3)  |
| C61 | C62 | 1.364(9) | C1   | P1  | Au   | 112.8(2)  |
| C61 | C63 | 1.46(1)  | C7   | P1  | C13  | 105.4(3)  |
| C62 | H62 | 0.931    | C7   | P1  | Au   | 110.2(2)  |
| C63 | F7  | 1.22(1)  | C13  | P1  | Au   | 114.0(2)  |
| C63 | F8  | 1.21(1)  | C19  | P2  | C25  | 106.1(3)  |
| C63 | F9  | 1.22(2)  | C19  | P2  | C31  | 104.8(2)  |
| C64 | F4  | 1.23(1)  | C19  | P2  | Au   | 109.4(2)  |
| C64 | F5  | 1.26(2)  | C25  | P2  | C31  | 108.3(3)  |
| C64 | F6  | 1.26(1)  | C25  | P2  | Au   | 112.3(2)  |
| C65 | C66 | 1.395(8) | C31  | P2  | Au   | 115.3(2)  |
| C65 | C70 | 1.384(9) | C42  | C41 | C46  | 115.6(5)  |
| C65 | B   | 1.645(8) | C42  | C41 | B    | 124.9(5)  |
| C66 | H66 | 0.93     | C46  | C41 | B    | 119.5(5)  |
| C66 | C67 | 1.372(8) | C41  | C42 | H42  | 118.8     |
| C67 | C68 | 1.37(1)  | C41  | C42 | C43  | 122.3(5)  |
| C67 | C71 | 1.46(1)  | H42  | C42 | C43  | 118.8     |
| C68 | H68 | 0.929    | C42  | C43 | C44  | 120.0(6)  |
| C68 | C69 | 1.37(1)  | C42  | C43 | C47  | 121.0(6)  |
| C69 | C70 | 1.392(9) | C44  | C43 | C47  | 119.0(7)  |
| C69 | C72 | 1.55(2)  | C43  | C44 | H44  | 120.2     |
| C70 | H70 | 0.93     | C43  | C44 | C45  | 119.5(7)  |
| C71 | F1  | 1.29(1)  | H44  | C44 | C45  | 120.3     |
| C71 | F2  | 1.35(2)  | C44  | C45 | C46  | 119.3(6)  |
| C71 | F3  | 1.19(1)  | C44  | C45 | C48  | 121.2(7)  |
| C72 | F22 | 1.23(2)  | C46  | C45 | C48  | 119.5(7)  |
| C72 | F23 | 1.34(3)  | C41  | C46 | C45  | 123.3(6)  |
| C72 | F24 | 1.16(2)  | C41  | C46 | H46  | 118.4     |
|     |     |          | C45  | C46 | H46  | 118.3     |
|     |     |          | C43  | C47 | F13  | 115.3(8)  |
|     |     |          | C43  | C47 | F14  | 116.0(8)  |
|     |     |          | C43  | C47 | F15  | 114.8(8)  |
|     |     |          | F13  | C47 | F14  | 105.0(9)  |
|     |     |          | F13  | C47 | F15  | 101.4(9)  |
|     |     |          | F14  | C47 | F15  | 102.5(8)  |
|     |     |          | C45  | C48 | F10  | 115.9(8)  |
|     |     |          | C45  | C48 | F11  | 109.5(8)  |
|     |     |          | C45  | C48 | F12  | 114.3(8)  |
|     |     |          | F10  | C48 | F11  | 103.1(8)  |
|     |     |          | F10  | C48 | F12  | 111.1(9)  |
|     |     |          | F11  | C48 | F12  | 101.2(8)  |



|     |     |     |          |
|-----|-----|-----|----------|
| C50 | C49 | C54 | 114.1(5) |
| C50 | C49 | B   | 120.3(5) |
| C54 | C49 | B   | 125.6(5) |
| C49 | C50 | H50 | 118.6    |
| C49 | C50 | C51 | 122.7(6) |
| H50 | C50 | C51 | 118.7    |
| C50 | C51 | C52 | 120.7(7) |
| C50 | C51 | C56 | 118.7(7) |
| C52 | C51 | C56 | 120.6(7) |
| C51 | C52 | H52 | 120.4    |
| C51 | C52 | C53 | 119.2(7) |
| H52 | C52 | C53 | 120.4    |
| C52 | C53 | C54 | 119.7(6) |
| C52 | C53 | C55 | 119.7(6) |
| C54 | C53 | C55 | 120.6(6) |
| C49 | C54 | C53 | 123.7(5) |
| C49 | C54 | H54 | 118.2    |
| C53 | C54 | H54 | 118.1    |
| C53 | C55 | F16 | 114.4(7) |
| C53 | C55 | F17 | 114.6(7) |
| C53 | C55 | F18 | 111.9(7) |
| F16 | C55 | F17 | 104.9(7) |
| F16 | C55 | F18 | 105.7(7) |
| F17 | C55 | F18 | 104.4(7) |
| C51 | C56 | F19 | 116(1)   |
| C51 | C56 | F20 | 116(1)   |
| C51 | C56 | F21 | 114(1)   |
| F19 | C56 | F20 | 104(1)   |
| F19 | C56 | F21 | 103(1)   |
| F20 | C56 | F21 | 102(1)   |
| C58 | C57 | C62 | 113.0(5) |
| C58 | C57 | B   | 121.0(5) |
| C62 | C57 | B   | 126.0(5) |
| C57 | C58 | H58 | 118.1    |
| C57 | C58 | C59 | 123.8(6) |
| H58 | C58 | C59 | 118      |
| C58 | C59 | C60 | 120.0(6) |
| C58 | C59 | C64 | 120.5(7) |
| C60 | C59 | C64 | 119.5(7) |
| C59 | C60 | H60 | 120.9    |
| C59 | C60 | C61 | 118.3(7) |
| H60 | C60 | C61 | 120.8    |
| C60 | C61 | C62 | 120.9(6) |
| C60 | C61 | C63 | 120.1(7) |
| C62 | C61 | C63 | 119.0(7) |
| C57 | C62 | C61 | 123.9(6) |
| C57 | C62 | H62 | 118      |
| C61 | C62 | H62 | 118.1    |

|     |     |     |          |
|-----|-----|-----|----------|
| C61 | C63 | F7  | 117.4(9) |
| C61 | C63 | F8  | 117.4(9) |
| C61 | C63 | F9  | 116.3(9) |
| F7  | C63 | F8  | 104(1)   |
| F7  | C63 | F9  | 100(1)   |
| F8  | C63 | F9  | 98.7(9)  |
| C59 | C64 | F4  | 114.7(8) |
| C59 | C64 | F5  | 114.8(8) |
| C59 | C64 | F6  | 116.5(8) |
| F4  | C64 | F5  | 103.9(9) |
| F4  | C64 | F6  | 104.4(8) |
| F5  | C64 | F6  | 100.8(8) |
| C66 | C65 | C70 | 113.7(5) |
| C66 | C65 | B   | 124.6(5) |
| C70 | C65 | B   | 121.7(5) |
| C65 | C66 | H66 | 117.5    |
| C65 | C66 | C67 | 125.0(6) |
| H66 | C66 | C67 | 117.4    |
| C66 | C67 | C68 | 119.1(6) |
| C66 | C67 | C71 | 119.9(7) |
| C68 | C67 | C71 | 121.0(7) |
| C67 | C68 | H68 | 120.7    |
| C67 | C68 | C69 | 118.6(7) |
| H68 | C68 | C69 | 120.7    |
| C68 | C69 | C70 | 121.0(8) |
| C68 | C69 | C72 | 118.6(9) |
| C70 | C69 | C72 | 120.3(9) |
| C65 | C70 | C69 | 122.4(7) |
| C65 | C70 | H70 | 118.8    |
| C69 | C70 | H70 | 118.8    |
| C67 | C71 | F1  | 113.4(9) |
| C67 | C71 | F2  | 111(1)   |
| C67 | C71 | F3  | 120(1)   |
| F1  | C71 | F2  | 95(1)    |
| F1  | C71 | F3  | 112(1)   |
| F2  | C71 | F3  | 102(1)   |
| C69 | C72 | F22 | 115(1)   |
| C69 | C72 | F23 | 103(1)   |
| C69 | C72 | F24 | 113(1)   |
| F22 | C72 | F23 | 111(2)   |
| F22 | C72 | F24 | 106(2)   |
| F23 | C72 | F24 | 109(2)   |
| C41 | B   | C49 | 109.6(5) |
| C41 | B   | C57 | 106.7(5) |
| C41 | B   | C65 | 110.8(5) |
| C49 | B   | C57 | 110.7(5) |
| C49 | B   | C65 | 108.5(5) |
| C57 | B   | C65 | 110.5(5) |

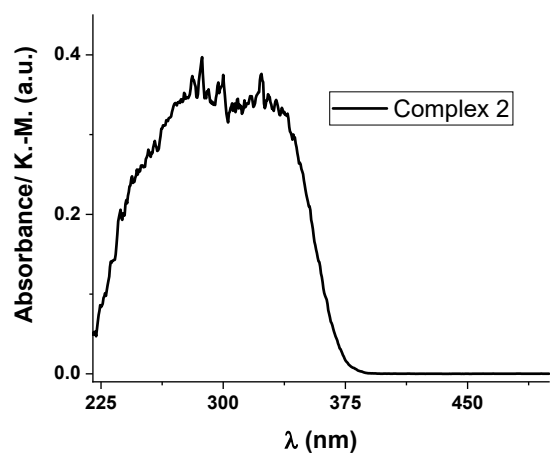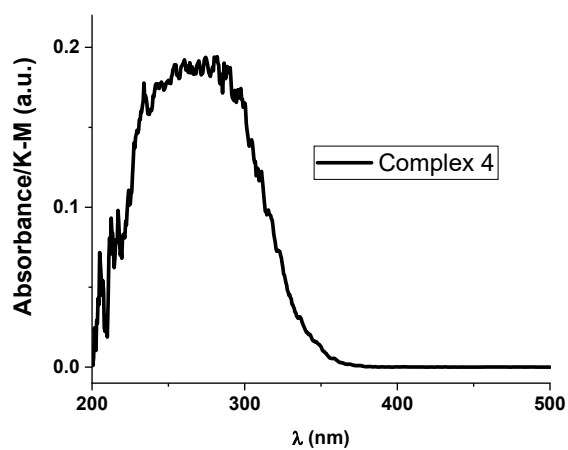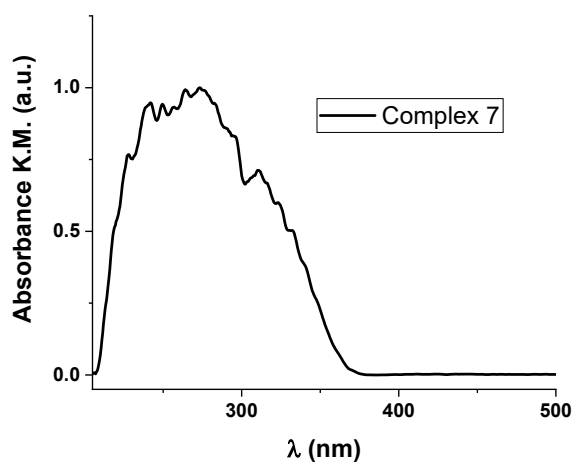

**Figure 7S.** UV-Vis spectra in solid state for complexes 2, 4 and 7.

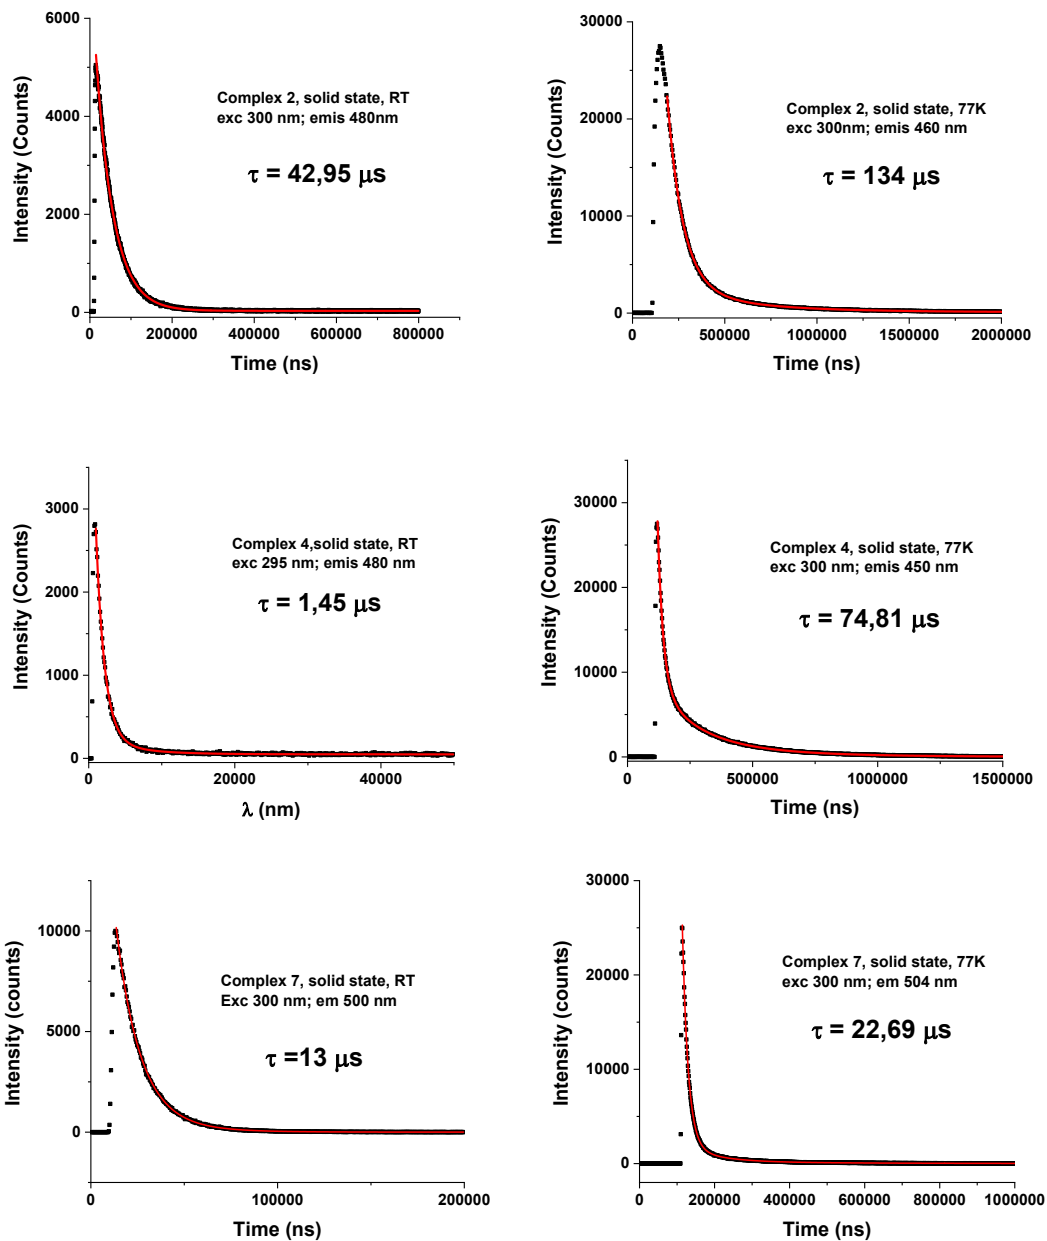

**Figure 8S.** Lifetime measurements for complexes 2, 4 and 7 in solid state at RT and 77K.

**Table 7S. XYZ COORDINATES FOR OPTIMIZED MODEL SYSTEMS****Model 4a in the ground state S<sub>0</sub>**

76

Au -0.014806 -0.005103 -5.359755  
Cl -0.080361 -0.012528 -2.894902  
P 0.000089 2.109958 -6.341278  
O -0.011421 6.796236 -1.416233  
H -0.127237 7.658723 -0.948672  
O -0.817768 8.106537 -3.073595  
C -0.148707 3.577047 -5.266171  
C 0.234896 3.455973 -3.914943  
H 0.555640 2.475768 -3.519762  
C 0.157966 4.568400 -3.064710  
H 0.449456 4.475986 -2.008086  
C -0.310098 5.803421 -3.555557  
C -0.709913 5.917946 -4.903964  
H -1.081668 6.891399 -5.260368  
C -0.633667 4.811532 -5.754720  
H -0.955146 4.900675 -6.805022  
C -0.416249 7.018813 -2.695005  
C -1.409830 2.284784 -7.489597  
C -2.704310 2.094168 -6.955163  
H -2.825890 1.888631 -5.878085  
C -3.828225 2.151314 -7.788858  
H -4.832768 2.000645 -7.361259  
C -3.673814 2.387297 -9.167010  
H -4.558624 2.426889 -9.823256  
C -2.389674 2.571373 -9.703403  
H -2.262171 2.759382 -10.782290  
C -1.259139 2.524783 -8.869513  
H -0.254664 2.671896 -9.296701  
C 1.480829 2.413430 -7.365104  
C 2.167221 3.644652 -7.376220  
H 1.821140 4.476170 -6.743099  
C 3.299552 3.811881 -8.190043  
H 3.833520 4.776227 -8.186294  
C 3.751043 2.758941 -9.002182  
H 4.641585 2.894427 -9.637573  
C 3.071172 1.528754 -8.993760  
H 3.422368 0.687996 -9.613714

C 1.948556 1.353484 -8.172829  
H 1.433578 0.379306 -8.148539  
P 0.003335 -2.109265 -6.362177  
O -0.036519 -6.844893 -1.485392  
H 0.077353 -7.711231 -1.024503  
O 0.818303 -8.129875 -3.138287  
C 0.151395 -3.584643 -5.298531  
C -0.259745 -3.480447 -3.953916  
H -0.598770 -2.507414 -3.555737  
C -0.189372 -4.600659 -3.113481  
H -0.502932 -4.521583 -2.062093  
C 0.299515 -5.826535 -3.607190  
C 0.727319 -5.923654 -4.948318  
H 1.114790 -6.890146 -5.306930  
C 0.657499 -4.809510 -5.789580  
H 0.999817 -4.885426 -6.834238  
C 0.398433 -7.049959 -2.757237  
C 1.417228 -2.270700 -7.507414  
C 2.710077 -2.080772 -6.969045  
H 2.829062 -1.882831 -5.890311  
C 3.835927 -2.129237 -7.800656  
H 4.839231 -1.979357 -7.369861  
C 3.685081 -2.355442 -9.180842  
H 4.571381 -2.387954 -9.835472  
C 2.402500 -2.538292 -9.721338  
H 2.277605 -2.718390 -10.801877  
C 1.270135 -2.500652 -8.889455  
H 0.266961 -2.647299 -9.319809  
C -1.472647 -2.409745 -7.393844  
C -2.144908 -3.648273 -7.427731  
H -1.791001 -4.486366 -6.807786  
C -3.273170 -3.814401 -8.247312  
H -3.796225 -4.784621 -8.261354  
C -3.734681 -2.752830 -9.042468  
H -4.622134 -2.887557 -9.682348  
C -3.068918 -1.515363 -9.011238  
H -3.428075 -0.668196 -9.617810  
C -1.950146 -1.341520 -8.184703  
H -1.446162 -0.362176 -8.142964

**Model 4a in the excited state T<sub>1</sub>**

76

Au -0.058204 0.045557 -4.687883  
Cl -0.136019 -0.252859 -2.371273  
P -0.059142 1.808021 -6.267674  
O -0.966512 7.162076 -2.173628  
H -1.025976 8.104403 -1.885549  
O -0.351896 8.284188 -4.043981  
C -0.072111 3.375285 -5.370810  
C -0.495250 3.443469 -4.018824  
H -0.687220 2.515870 -3.452835

C -0.654640 4.678685 -3.388403  
H -0.967392 4.723117 -2.334751  
C -0.405740 5.882061 -4.093234  
C 0.013950 5.814002 -5.446220  
H 0.209420 6.758682 -5.977559  
C 0.176966 4.585555 -6.079077  
H 0.505445 4.551952 -7.130349  
C -0.559578 7.218227 -3.477724  
C -1.546562 1.759038 -7.287659  
C -2.707912 1.138649 -6.764162  
H -2.650574 0.587651 -5.810767  
C -3.924367 1.219839 -7.448715

H -4.815409 0.725050 -7.030176  
C -4.009125 1.919667 -8.666709  
H -4.968911 1.983307 -9.204181  
C -2.862652 2.546659 -9.188979  
H -2.922208 3.107150 -10.136490  
C -1.642186 2.479313 -8.505650  
H -0.760294 2.998041 -8.913244  
C 1.391820 1.892418 -7.347074  
C 2.587252 2.426380 -6.811463  
H 2.588344 2.848349 -5.793505  
C 3.760615 2.435735 -7.577509  
H 4.683237 2.865142 -7.154009  
C 3.762471 1.900920 -8.876778  
H 4.687488 1.905722 -9.475704  
C 2.583434 1.347790 -9.405859  
H 2.580237 0.913903 -10.418365  
C 1.407574 1.337841 -8.645644  
H 0.489011 0.903817 -9.065622  
P 0.034603 -1.810425 -6.219401  
O 1.027207 -7.260570 -2.281087  
H 1.093140 -8.210182 -2.019503  
O 0.366844 -8.332331 -4.165272  
C 0.051392 -3.389863 -5.349317  
C 0.509476 -3.492315 -4.011841  
H 0.706067 -2.581510 -3.423584  
C 0.687049 -4.744872 -3.421566  
H 1.025899 -4.817002 -2.377537  
C 0.420638 -5.929632 -4.151269

**Model 4b in the ground state  $S_0$**   
264

Au 0.000000 0.000000 -6.334368  
Cl 0.000000 0.000000 -3.546533  
P -0.442656 2.245577 -6.727648  
O 2.494432 5.754112 -1.752397  
H 2.802786 6.498150 -1.080493  
O 0.574489 6.955869 -1.851234  
C -0.036706 3.329701 -5.330505  
C 1.172495 3.071250 -4.652072  
H 1.779878 2.191844 -4.922348  
C 1.608874 3.925639 -3.635163  
H 2.554659 3.721175 -3.113377  
C 0.823019 5.036750 -3.266982  
C -0.404119 5.272578 -3.917782  
H -1.000736 6.143900 -3.605551  
C -0.832665 4.429954 -4.951573  
H -1.784236 4.628411 -5.469633  
C 1.273470 6.010259 -2.213172  
C -2.183474 2.545480 -7.168039  
C -3.172074 1.689545 -6.640054  
H -2.895989 0.863418 -5.962337  
C -4.523345 1.905145 -6.951372  
H -5.288578 1.233296 -6.530257  
C -4.893590 2.966157 -7.793626

C -0.035218 -5.826085 -5.489461  
H -0.245906 -6.755981 -6.040773  
C -0.216954 -4.581321 -6.084264  
H -0.573787 -4.520284 -7.124905  
C 0.588682 -7.282039 -3.575732  
C 1.536794 -1.723759 -7.211277  
C 2.677128 -1.084658 -6.664080  
H 2.592718 -0.537174 -5.710848  
C 3.907440 -1.145049 -7.325031  
H 4.782000 -0.636333 -6.889026  
C 4.027019 -1.840692 -8.542745  
H 4.997826 -1.886924 -9.061815  
C 2.901393 -2.484911 -9.088771  
H 2.988436 -3.042069 -10.036142  
C 1.666767 -2.438788 -8.429833  
H 0.801948 -2.972352 -8.854479  
C -1.402900 -1.879873 -7.312598  
C -2.608011 -2.404981 -6.789437  
H -2.624569 -2.821203 -5.769220  
C -3.770672 -2.411560 -7.571393  
H -4.701936 -2.832216 -7.158360  
C -3.750376 -1.884304 -8.873824  
H -4.667179 -1.887227 -9.485300  
C -2.561714 -1.341311 -9.390721  
H -2.542990 -0.913025 -10.405370  
C -1.396134 -1.332769 -8.614336  
H -0.469506 -0.905088 -9.022322

H -5.955413 3.129499 -8.040483  
C -3.909606 3.816985 -8.325256  
H -4.197153 4.648221 -8.989316  
C -2.556710 3.609214 -8.016775  
H -1.786119 4.271053 -8.443284  
C 0.510895 2.937876 -8.121382  
C 1.161071 4.185088 -8.038091  
H 1.127501 4.762855 -7.101487  
C 1.858361 4.688408 -9.148569  
H 2.369460 5.661885 -9.074330  
C 1.904780 3.956454 -10.345119  
H 2.453837 4.354088 -11.214063  
C 1.257043 2.711298 -10.431679  
H 1.297570 2.130167 -11.367079  
C 0.569508 2.200281 -9.323015  
H 0.072284 1.217328 -9.378766  
P 0.442656 -2.245577 -6.727648  
O -2.494432 -5.754112 -1.752397  
H -2.802786 -6.498150 -1.080493  
O -0.574489 -6.955869 -1.851234  
C 0.036706 -3.329701 -5.330505  
C -1.172495 -3.071250 -4.652072  
H -1.779878 -2.191844 -4.922348  
C -1.608874 -3.925639 -3.635163  
H -2.554659 -3.721175 -3.113377  
C -0.823019 -5.036750 -3.266982

C 0.404119 -5.272578 -3.917782  
H 1.000736 -6.143900 -3.605551  
C 0.832665 -4.429954 -4.951573  
H 1.784236 -4.628411 -5.469633  
C -1.273470 -6.010259 -2.213172  
C 2.183474 -2.545480 -7.168039  
C 3.172074 -1.689545 -6.640054  
H 2.895989 -0.863418 -5.962337  
C 4.523345 -1.905145 -6.951372  
H 5.288578 -1.233296 -6.530257  
C 4.893590 -2.966157 -7.793626  
H 5.955413 -3.129499 -8.040483  
C 3.909606 -3.816985 -8.325256  
H 4.197153 -4.648221 -8.989316  
C 2.556710 -3.609214 -8.016775  
H 1.786119 -4.271053 -8.443284  
C -0.510895 -2.937876 -8.121382  
C -1.161071 -4.185088 -8.038091  
H -1.127501 -4.762855 -7.101487  
C -1.858361 -4.688408 -9.148569  
H -2.369460 -5.661885 -9.074330  
C -1.904780 -3.956454 -10.345119  
H -2.453837 -4.354088 -11.214063  
C -1.257043 -2.711298 -10.431679  
H -1.297570 -2.130167 -11.367079  
C -0.569508 -2.200281 -9.323015  
H -0.072284 -1.217328 -9.378766  
O -2.960694 0.220247 -3.729850  
H -1.954909 0.110051 -3.653941  
C -3.280304 1.561363 -3.332012  
H -3.495329 1.607675 -2.242380  
H -4.189968 1.877537 -3.885872  
H -2.447408 2.253031 -3.591092  
Au -3.795646 -7.111127 3.328123  
Cl -5.695678 -7.760218 1.496084  
P -2.331392 -8.896338 3.540008  
O -5.392528 -14.311412 0.793811  
H -5.524296 -15.173815 0.330046  
O -3.258481 -14.938966 0.386844  
C -2.822363 -10.467091 2.751522  
C -4.197639 -10.755765 2.630623  
H -4.946223 -10.025060 2.975674  
C -4.614771 -11.947028 2.023088  
H -5.686967 -12.168292 1.918821  
C -3.660316 -12.853551 1.518813  
C -2.285823 -12.560084 1.631602  
H -1.559681 -13.279783 1.222927  
C -1.867019 -11.374946 2.244601  
H -0.792797 -11.143664 2.319675  
C -4.046267 -14.129628 0.846228  
C -0.660758 -8.565192 2.897650  
C -0.549215 -7.934807 1.640113  
H -1.454792 -7.607436 1.099732  
C 0.713252 -7.745492 1.058481  
H 0.770904 -7.280136 0.061674

C 1.868701 -8.163873 1.739326  
H 2.861563 -8.011285 1.285075  
C 1.761747 -8.778680 2.998479  
H 2.668102 -9.106775 3.533507  
C 0.500600 -8.986438 3.578776  
H 0.421225 -9.478831 4.560938  
C -2.090375 -9.304976 5.300672  
C -2.318456 -10.590965 5.825503  
H -2.644644 -11.406740 5.161883  
C -2.134058 -10.831394 7.197655  
H -2.321606 -11.838773 7.603412  
C -1.711802 -9.797207 8.046916  
H -1.567329 -9.990263 9.122401  
C -1.476064 -8.513116 7.523022  
H -1.143412 -7.695287 8.183495  
C -1.672229 -8.264133 6.159019  
H -1.502659 -7.253602 5.751617  
P -4.374560 -4.928648 3.906854  
O -3.576594 -1.614549 -1.991130  
H -3.448625 -0.860645 -2.698200  
O -4.509635 0.052633 -0.769091  
C -4.308037 -3.801290 2.484160  
C -3.610101 -4.191079 1.323246  
H -3.119980 -5.177459 1.280041  
C -3.552620 -3.336890 0.213522  
H -3.016029 -3.656085 -0.690919  
C -4.188105 -2.082219 0.257845  
C -4.888803 -1.693340 1.418034  
H -5.373881 -0.705245 1.424738  
C -4.958160 -2.547810 2.522264  
H -5.524493 -2.248080 3.418966  
C -4.115354 -1.103860 -0.882978  
C -6.030615 -4.673631 4.617486  
C -7.121042 -5.102706 3.832772  
H -6.972012 -5.589280 2.856176  
C -8.432765 -4.885889 4.273413  
H -9.261434 -5.209447 3.623624  
C -8.666001 -4.263581 5.511433  
H -9.697750 -4.098547 5.863396  
C -7.581009 -3.845673 6.300306  
H -7.759608 -3.352469 7.269948  
C -6.263149 -4.040355 5.855237  
H -5.419436 -3.692014 6.470944  
C -3.207483 -4.258307 5.137288  
C -2.431329 -3.108748 4.893973  
H -2.538454 -2.562972 3.943610  
C -1.513249 -2.662523 5.859317  
H -0.902739 -1.767783 5.655070  
C -1.373141 -3.349050 7.075021  
H -0.653509 -2.995000 7.830905  
C -2.150321 -4.494747 7.324343  
H -2.045654 -5.040574 8.276661  
C -3.054209 -4.954431 6.357373  
H -3.645041 -5.866714 6.545037  
O 2.960694 -0.220247 -3.729850

H 1.954909 -0.110051 -3.653941  
C 3.280304 -1.561363 -3.332012  
H 3.495329 -1.607675 -2.242380  
H 4.189968 -1.877537 -3.885872  
H 2.447408 -2.253031 -3.591092  
Au 3.795646 7.111127 3.328123  
Cl 5.695678 7.760218 1.496084  
P 2.331392 8.896338 3.540008  
O 5.392528 14.311412 0.793811  
H 5.524296 15.173815 0.330046  
O 3.258481 14.938966 0.386844  
C 2.822363 10.467091 2.751522  
C 4.197639 10.755765 2.630623  
H 4.946223 10.025060 2.975674  
C 4.614771 11.947028 2.023088  
H 5.686967 12.168292 1.918821  
C 3.660316 12.853551 1.518813  
C 2.285823 12.560084 1.631602  
H 1.559681 13.279783 1.222927  
C 1.867019 11.374946 2.244601  
H 0.792797 11.143664 2.319675  
C 4.046267 14.129628 0.846228  
C 0.660758 8.565192 2.897650  
C 0.549215 7.934807 1.640113  
H 1.454792 7.607436 1.099732  
C -0.713252 7.745492 1.058481  
H -0.770904 7.280136 0.061674  
C -1.868701 8.163873 1.739326  
H -2.861563 8.011285 1.285075  
C -1.761747 8.778680 2.998479  
H -2.668102 9.106775 3.533507  
C -0.500600 8.986438 3.578776  
H -0.421225 9.478831 4.560938  
C 2.090375 9.304976 5.300672  
C 2.318456 10.590965 5.825503  
H 2.644644 11.406740 5.161883  
C 2.134058 10.831394 7.197655  
H 2.321606 11.838773 7.603412  
C 1.711802 9.797207 8.046916  
H 1.567329 9.990263 9.122401  
C 1.476064 8.513116 7.523022  
H 1.143412 7.695287 8.183495  
C 1.672229 8.264133 6.159019  
H 1.502659 7.253602 5.751617  
P 4.374560 4.928648 3.906854  
O 3.576594 1.614549 -1.991130  
H 3.448625 0.860645 -2.698200  
O 4.509635 -0.052633 -0.769091  
C 4.308037 3.801290 2.484160  
C 3.610101 4.191079 1.323246  
H 3.119980 5.177459 1.280041  
C 3.552620 3.336890 0.213522  
H 3.016029 3.656085 -0.690919

C 4.188105 2.082219 0.257845  
C 4.888803 1.693340 1.418034  
H 5.373881 0.705245 1.424738  
C 4.958160 2.547810 2.522264  
H 5.524493 2.248080 3.418966  
C 4.115354 1.103860 -0.882978  
C 6.030615 4.673631 4.617486  
C 7.121042 5.102706 3.832772  
H 6.972012 5.589280 2.856176  
C 8.432765 4.885889 4.273413  
H 9.261434 5.209447 3.623624  
C 8.666001 4.263581 5.511433  
H 9.697750 4.098547 5.863396  
C 7.581009 3.845673 6.300306  
H 7.759608 3.352469 7.269948  
C 6.263149 4.040355 5.855237  
H 5.419436 3.692014 6.470944  
C 3.207483 4.258307 5.137288  
C 2.431329 3.108748 4.893973  
H 2.538454 2.562972 3.943610  
C 1.513249 2.662523 5.859317  
H 0.902739 1.767783 5.655070  
C 1.373141 3.349050 7.075021  
H 0.653509 2.995000 7.830905  
C 2.150321 4.494747 7.324343  
H 2.045654 5.040574 8.276661  
C 3.054209 4.954431 6.357373  
H 3.645041 5.866714 6.545037  
O 3.234355 7.602122 -0.143381  
H 4.124746 7.575768 0.358972  
C 3.039677 8.902111 -0.697986  
H 3.855947 9.169053 -1.408760  
H 2.069338 8.877488 -1.236493  
H 2.993024 9.671702 0.104818  
O -8.103049 -5.789322 0.914961  
H -7.434287 -6.523405 0.944051  
C -7.499517 -4.685193 0.272766  
H -7.371572 -4.837727 -0.829781  
H -8.165876 -3.805837 0.416795  
H -6.498010 -4.422498 0.695426  
O -3.234355 -7.602122 -0.143381  
H -4.124746 -7.575768 0.358972  
C -3.039677 -8.902111 -0.697986  
H -3.855947 -9.169053 -1.408760  
H -2.069338 -8.877488 -1.236493  
H -2.993024 -9.671702 0.104818  
O 8.103049 5.789322 0.914961  
H 7.434287 6.523405 0.944051  
C 7.499517 4.685193 0.272766  
H 7.371572 4.837727 -0.829781  
H 8.165876 3.805837 0.416795  
H 6.498010 4.422498 0.695426



### Model 4b in the excited state T<sub>1</sub>

264

Au 0.016949 -0.015855 -5.775590  
Cl 0.071814 -0.038070 -3.055297  
P -0.362610 2.239296 -6.221425  
O 2.726296 6.146939 -1.634769  
H 3.033767 6.966306 -1.072304  
O 0.845874 7.388152 -1.883705  
C 0.089165 3.411449 -4.925051  
C 1.313453 3.200713 -4.246456  
H 1.906721 2.293004 -4.444372  
C 1.783225 4.146208 -3.330792  
H 2.745216 3.982952 -2.824368  
C 1.022223 5.303536 -3.051735  
C -0.225808 5.482656 -3.688687  
H -0.807485 6.386423 -3.448854  
C -0.689737 4.551234 -4.621784  
H -1.652749 4.712707 -5.131277  
C 1.507815 6.378697 -2.132032  
C -2.086156 2.577487 -6.691136  
C -3.118566 1.791961 -6.137655  
H -2.885748 0.976016 -5.431510  
C -4.455351 2.062250 -6.468493  
H -5.256561 1.444841 -6.031100  
C -4.767940 3.107605 -7.353202  
H -5.818768 3.314217 -7.614103  
C -3.740270 3.887439 -7.910563  
H -3.982158 4.706559 -8.607183  
C -2.401525 3.624341 -7.584628  
H -1.596201 4.231026 -8.028525  
C 0.609754 2.745176 -7.683350  
C 1.500455 3.834999 -7.658218  
H 1.634254 4.415309 -6.732321  
C 2.221175 4.177864 -8.814784  
H 2.921199 5.028619 -8.786153  
C 2.049757 3.444975 -9.999224  
H 2.616659 3.717530 -10.904232  
C 1.154407 2.360591 -10.029058  
H 1.015119 1.783139 -10.957588  
C 0.442982 2.006730 -8.875671  
H -0.255245 1.152985 -8.893803  
P 0.380687 -2.273037 -6.229076  
O -2.732092 -6.141769 -1.630178  
H -3.051396 -6.958189 -1.069013  
O -0.870595 -7.409701 -1.887767  
C -0.076979 -3.440892 -4.930847  
C -1.297320 -3.217604 -4.249639  
H -1.882059 -2.304089 -4.446594  
C -1.773697 -4.157357 -3.331706  
H -2.732157 -3.984300 -2.821943

C -1.023458 -5.321718 -3.053874  
C 0.220817 -5.513989 -3.693820  
H 0.794179 -6.423260 -3.454702  
C 0.691620 -4.587655 -4.628837  
H 1.651793 -4.758741 -5.140627  
C -1.519350 -6.390988 -2.132349  
C 2.100949 -2.620411 -6.703363  
C 3.138321 -1.834277 -6.160173  
H 2.912395 -1.011910 -5.459485  
C 4.472645 -2.109667 -6.496655  
H 5.277365 -1.491002 -6.067671  
C 4.777885 -3.161240 -7.376493  
H 5.826796 -3.372113 -7.641641  
C 3.745297 -3.941901 -7.923626  
H 3.981447 -4.765649 -8.616743  
C 2.408981 -3.673263 -7.592466  
H 1.599741 -4.280131 -8.028964  
C -0.597901 -2.774601 -7.688137  
C -1.493711 -3.860246 -7.660745  
H -1.627751 -4.440086 -6.734593  
C -2.218903 -4.199809 -8.815455  
H -2.922855 -5.047257 -8.784997  
C -2.047130 -3.467734 -10.000372  
H -2.617616 -3.737668 -10.903909  
C -1.146749 -2.387585 -10.032532  
H -1.007157 -1.810795 -10.961426  
C -0.430639 -2.037104 -8.881032  
H 0.271741 -1.186806 -8.901151  
O -2.910641 0.226307 -3.243600  
H -1.909017 0.126293 -3.165093  
C -3.259405 1.538661 -2.778577  
H -3.440217 1.530825 -1.681317  
H -4.195897 1.845744 -3.291764  
H -2.458021 2.267894 -3.034608  
Au -3.801864 -7.747308 3.233619  
Cl -5.858162 -8.062745 1.597003  
P -2.546706 -9.722412 3.137197  
O -6.048576 -14.432169 -0.270204  
H -6.234303 -15.198879 -0.863629  
O -3.971187 -15.095059 -0.887205  
C -3.167973 -11.098649 2.161176  
C -4.568933 -11.304680 2.068561  
H -5.260360 -10.616227 2.579419  
C -5.077037 -12.351104 1.297498  
H -6.163849 -12.500564 1.218422  
C -4.200668 -13.214120 0.592436  
C -2.801715 -13.004481 0.685697  
H -2.135596 -13.682329 0.129616  
C -2.288714 -11.964045 1.458295  
H -1.200290 -11.805193 1.513090  
C -4.684506 -14.327068 -0.253254

C -0.857408 -9.398846 2.547182  
C -0.712681 -8.714999 1.319807  
H -1.603150 -8.371625 0.764612  
C 0.564889 -8.498549 0.783960  
H 0.645595 -7.983913 -0.186339  
C 1.702278 -8.946877 1.477228  
H 2.707413 -8.771244 1.059732  
C 1.561182 -9.624123 2.700153  
H 2.452144 -9.982503 3.241565  
C 0.285008 -9.856895 3.236385  
H 0.180943 -10.399606 4.188765  
C -2.365653 -10.312629 4.854841  
C -2.801917 -11.591812 5.248401  
H -3.237885 -12.274613 4.502086  
C -2.680042 -11.992082 6.589713  
H -3.027562 -12.992952 6.893185  
C -2.114760 -11.125424 7.538477  
H -2.018359 -11.443970 8.589138  
C -1.670552 -9.849640 7.145976  
H -1.219947 -9.166938 7.885549  
C -1.802894 -9.439805 5.812899  
H -1.461692 -8.436769 5.506753  
P -4.261050 -5.559287 3.952559  
O -3.472646 -1.745520 -1.626642  
H -3.363384 -0.939343 -2.271814  
O -4.273661 -0.158349 -0.217508  
C -4.189610 -4.321712 2.637325  
C -3.499361 -4.614280 1.441048  
H -3.038730 -5.605491 1.295094  
C -3.416437 -3.655840 0.423254  
H -2.890645 -3.899580 -0.509540  
C -4.016947 -2.392233 0.591915  
C -4.705257 -2.100626 1.788670  
H -5.160564 -1.103835 1.895066  
C -4.801955 -3.057117 2.801827  
H -5.355476 -2.829551 3.726553  
C -3.937361 -1.315558 -0.451580  
C -5.838342 -5.278314 4.812366  
C -7.019500 -5.387118 4.045973  
H -6.994203 -5.606913 2.964734  
C -8.265470 -5.180202 4.652400  
H -9.173757 -5.258315 4.033706  
C -8.346931 -4.877849 6.022325  
H -9.329196 -4.721805 6.497847  
C -7.172523 -4.768494 6.784809  
H -7.228716 -4.520987 7.857431  
C -5.918494 -4.963267 6.184618  
H -5.003348 -4.858012 6.786957  
C -2.949667 -5.126748 5.143567  
C -2.129136 -3.994042 4.974807  
H -2.287261 -3.324111 4.115607

C -1.104853 -3.725592 5.897701  
H -0.461703 -2.842493 5.753810  
C -0.898798 -4.576075 6.995886  
H -0.093754 -4.361733 7.717263  
C -1.717482 -5.706408 7.169839  
H -1.559715 -6.380276 8.028007  
C -2.730445 -5.988082 6.243344  
H -3.354276 -6.888742 6.367954  
O 3.056831 -0.210013 -3.280440  
H 2.054007 -0.134018 -3.189708  
C 3.443172 -1.512375 -2.817389  
H 3.642126 -1.496402 -1.723318  
H 4.377688 -1.799963 -3.345319  
H 2.654374 -2.260330 -3.057222  
Au 3.776377 7.759218 3.225373  
Cl 5.824203 8.152555 1.599853  
P 2.476487 9.707513 3.145311  
O 5.875982 14.517886 -0.223426  
H 6.045596 15.290728 -0.813693  
O 3.786222 15.129892 -0.851092  
C 3.066583 11.104908 2.181142  
C 4.462481 11.347662 2.097965  
H 5.168355 10.676387 2.611734  
C 4.948086 12.409313 1.333553  
H 6.031111 12.587357 1.262080  
C 4.054277 13.251529 0.625239  
C 2.660480 13.005592 0.709321  
H 1.980527 13.668032 0.151417  
C 2.169669 11.949883 1.475459  
H 1.085296 11.763581 1.523639  
C 4.514806 14.378359 -0.214738  
C 0.794143 9.350643 2.555427  
C 0.661794 8.667784 1.326114  
H 1.558214 8.343864 0.768847  
C -0.611849 8.427890 0.790785  
H -0.683366 7.915245 -0.181264  
C -1.757135 8.851631 1.486443  
H -2.759021 8.657290 1.069449  
C -1.628271 9.528038 2.711210  
H -2.525605 9.867541 3.254238  
C -0.356456 9.784081 3.247080  
H -0.262133 10.325935 4.200953  
C 2.286902 10.276339 4.869044  
C 2.703203 11.558233 5.275455  
H 3.126662 12.255704 4.535569  
C 2.577135 11.942348 6.621065  
H 2.909004 12.945428 6.934508  
C 2.027128 11.056800 7.561411  
H 1.927158 11.362759 8.615463  
C 1.602491 9.778392 7.156086  
H 1.163970 9.080925 7.889081

C 1.739275 9.384695 5.818530  
H 1.413337 8.379668 5.502451  
P 4.300721 5.580224 3.928388  
O 3.578923 1.770007 -1.661748  
H 3.485333 0.963264 -2.309383  
O 4.440593 0.201959 -0.266992  
C 4.260362 4.348713 2.606983  
C 3.546180 4.623890 1.420438  
H 3.050993 5.599925 1.285268  
C 3.482040 3.667825 0.399196  
H 2.937155 3.898173 -0.525954  
C 4.125955 2.423865 0.554107  
C 4.838225 2.149744 1.740947  
H 5.326652 1.167745 1.837467  
C 4.915704 3.104090 2.757747  
H 5.487268 2.890339 3.674728  
C 4.067696 1.349686 -0.493066  
C 5.885210 5.340959 4.787077  
C 7.063259 5.474263 4.019609  
H 7.032104 5.685006 2.936332  
C 8.313759 5.303448 4.628182  
H 9.220584 5.400563 4.010009  
C 8.402705 5.013103 6.000182  
H 9.388485 4.884979 6.476782  
C 7.231285 4.879170 6.763332  
H 7.293519 4.640867 7.837707  
C 5.973076 5.037914 6.161635  
H 5.060912 4.913439 6.764813  
C 3.001233 5.106599 5.117228  
C 2.216597 3.949183 4.945483  
H 2.396699 3.285306 4.085822  
C 1.199593 3.647801 5.866109  
H 0.584459 2.745306 5.719981  
C 0.965252 4.489876 6.965082  
H 0.165825 4.249772 7.684606  
C 1.748007 5.644834 7.142000  
H 1.567855 6.312364 8.000731  
C 2.753354 5.959199 6.217715  
H 3.348342 6.878940 6.344445  
O 3.482843 8.228883 -0.305131  
H 4.323441 8.191628 0.252377  
C 3.478587 9.405068 -1.115257  
H 4.329830 9.407856 -1.836385  
H 2.521067 9.400109 -1.675822  
H 3.532091 10.320343 -0.485672  
O -7.872657 -5.713648 0.960441  
H -7.369249 -6.563881 1.057967  
C -7.134390 -4.880136 0.088870  
H -7.056663 -5.301224 -0.945721  
H -7.667511 -3.907192 0.022736  
H -6.096961 -4.676764 0.452172

O -3.522200 -8.212053 -0.306915  
H -4.362150 -8.154291 0.250388  
C -3.547923 -9.382877 -1.124187  
H -4.399123 -9.359760 -1.844972  
H -2.590865 -9.398662 -1.685385  
H -3.624197 -10.300323 -0.500273  
O 7.854550 5.830278 0.925623  
H 7.351921 6.679685 1.032504  
C 7.132912 5.019886 0.018951  
H 7.107439 5.449783 -1.014732  
H 7.645429 4.035093 -0.033297  
H 6.077353 4.838899 0.338609
